# Supplementary material for: Metal-free iodine-catalyzed direct cross-dehydrogenative coupling (CDC) between pyrazoles and thiols
Source: Royal Society of Chemistry journal article supplement (doi:10.1039/c6qo00407e), 2016-01-01
Supplement: c6qo00407e1.pdf [file c6qo00407e1.pdf]

## Supporting Information

### Metal-Free Iodine-Catalyzed Direct Cross-Dehydrogenative Coupling (CDC) Between Pyrazoles and Thiols

Daoshan Yang,\* Pengfei Sun, Wei Wei, Lingduan Meng, Lingchao He, Baokai Fang,  
Wei Jiang, and Hua Wang\*

The Key Laboratory of Life-Organic Analysis and Key Laboratory of Pharmaceutical  
Intermediates and Analysis of Natural Medicine, School of Chemistry and Chemical  
Engineering, Qufu Normal University, Qufu 273165, Shandong, P. R. China.

Fax: +86-5374458306

E-mail: [yangdaoshan@tsinghua.org.cn](mailto:yangdaoshan@tsinghua.org.cn); [huawang\\_qfnu@126.com](mailto:huawang_qfnu@126.com)

#### Table of contents

|                                                                                |     |
|--------------------------------------------------------------------------------|-----|
| General Information                                                            | P2  |
| General experimental procedures for synthesis of C-4<br>sulfenylated pyrazoles | P2  |
| General procedure for synthesis of compound <b>7</b>                           | P3  |
| General procedure for synthesis of compound <b>8</b>                           | P3  |
| Characterization data of products <b>3a-3ae</b> , <b>7</b> and <b>8</b>        | P4  |
| Reference                                                                      | P20 |
| The <sup>1</sup> H and <sup>13</sup> C NMR spectra of compounds                | P21 |
| Kinetic Isotopic Effect (KIE) Studies:                                         | P54 |

## General information

All commercially available reagent-grade chemicals were purchased from chemical suppliers and used as received without further purification unless otherwise stated. pyrazoles were prepared according to previous literatures.<sup>1</sup> Proton and carbon magnetic resonance spectra (<sup>1</sup>H NMR and <sup>13</sup>C NMR) were recorded using either tetramethylsilane (TMS) as the internal standard in CDCl<sub>3</sub> (<sup>1</sup>H NMR: TMS at 0.00 ppm, CDCl<sub>3</sub> at 7.24 ppm; <sup>13</sup>C NMR: CDCl<sub>3</sub> at 77.0 ppm) or tetramethylsilane (TMS) as the internal standard in DMSO-*d*<sub>6</sub> (<sup>1</sup>H NMR: TMS at 0.00 ppm, DMSO at 2.50 ppm; <sup>13</sup>C NMR: DMSO at 40.0 ppm). The chemical shifts ( $\delta$ ) were expressed in ppm and *J* values were given in Hz. The following abbreviations are used to indicate the multiplicity: singlet (s), doublet (d), triplet (t) and multiplet (m). All first order splitting patterns were assigned on the basis of the appearance of the multiplet. Splitting patterns that could not be easily interpreted were designated as multiplet (m). Mass analyses and HRMS were obtained by ESI on a TOF mass analyzer. Column chromatography was performed on silica gel (200-300 mesh).

## General experimental procedures for synthesis of C-4 sulfenylated pyrazoles

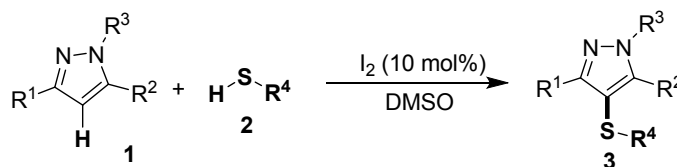

A 25 ml Schlenk tube equipped with a magnetic stirring bar was charged with iodine (5 mg, 0.02 mmol), substituted various pyrazole (1) (0.2 mmol), thiols (2) (0.24 mmol), and DMSO (2 mL). The tube was sealed, and then the mixture was

stirred under air atmosphere at 100 °C for 18 h. After completion of the reaction, the resulting solution was cooled down to room temperature, and the solvent was removed with the aid of a rotary evaporator. The residue was purified by column chromatography on silica gel using petroleum ether/ethyl acetate as eluent to provide the desired product (**3**).

### General procedure for synthesis of compounds **7**<sup>2</sup>

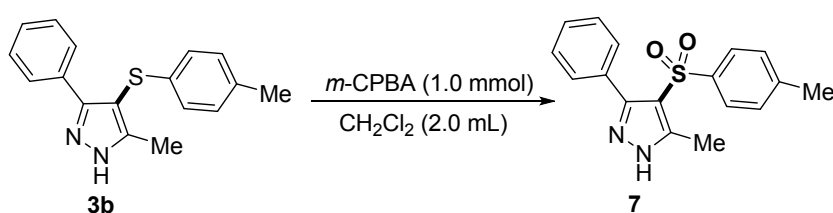

A solution of **3b** (0.3 mmol) in 2 mL CH<sub>2</sub>Cl<sub>2</sub> was cooled to 0 °C. Then, *m*-CPBA (0.104g, 0.6 mmol) dissolved in 2 mL CH<sub>2</sub>Cl<sub>2</sub> was added drop wise to the stirred solution of **3b**. The reaction progress was monitored by TLC. After completion of the reaction, the resulting solution was cooled to room temperature, and the solvent was removed with the aid of a rotary evaporator. The residue was purified by column chromatography on silica gel using petroleum ether/ethyl acetate as eluent to provide the desired product **7** in 73% yield as a white solid.

### General procedure for synthesis of compounds **5**

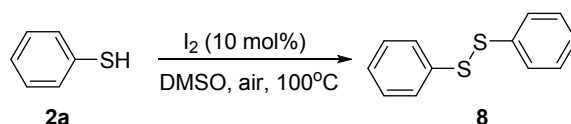

A 25 ml Schlenk tube equipped with a magnetic stirring bar was charged with iodine (5 mg, 0.02 mmol), benzenethiol (0.24 mmol), and DMSO (2 mL). The tube was sealed, and then the mixture was stirred under air atmosphere at 100 °C for 18 h. After

completion of the reaction, the resulting solution was cooled down to room temperature, and the solvent was removed with the aid of a rotary evaporator. The residue was purified by column chromatography on silica gel using petroleum ether/ethyl acetate as eluent to provide the desired product (**8**).

#### Characterization data of products **3a-3ae**, **4** and **5**

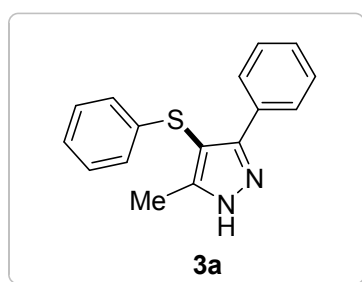

**5-Methyl-3-phenyl-4-(phenylthio)-1H-pyrazole (3a)**. Eluent petroleum ether/ethyl acetate (4:1). Yellow solid, 50 mg, 94% yield. (petroleum ether/ethyl acetate = 3:1,  $R_f = 0.3$ ).  $^1\text{H}$  NMR ( $\text{CDCl}_3$ , 500 MHz, ppm)  $\delta$  11.46 (s, br, 1H), 7.78 (dd, 2H,  $J = 5.0$  Hz), 7.35-7.34 (m, 3H), 7.24 (t, 2H,  $J = 10.0$  Hz), 7.12 (t, 1H,  $J = 10.0$  Hz), 7.07 (d, 2H,  $J = 10.0$  Hz), 2.16 (s, 3H).  $^{13}\text{C}$  NMR ( $\text{CDCl}_3$ , 125 MHz, ppm)  $\delta$  151.7, 149.5, 138.6, 129.0, 128.6, 128.5, 128.2, 127.9, 125.3, 124.9, 102.8, 10.6. HRMS  $m/z$  calcd. for  $\text{C}_{16}\text{H}_{15}\text{N}_2\text{S}[\text{M}+\text{H}]^+$ : 267.0950, found: 267.0948.

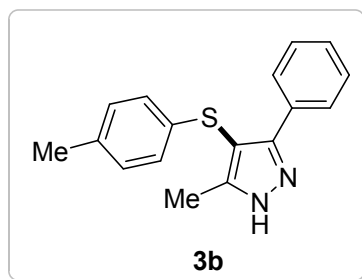

**5-Methyl-3-phenyl-4-(p-tolylthio)-1H-pyrazole (3b)**. Eluent petroleum ether/ethyl acetate (4:1). Brown solid, 51 mg, 92% yield. (petroleum ether/ethyl acetate = 3:1,

Rf= 0.3).  $^1\text{H}$  NMR ( $\text{CDCl}_3$ , 500 MHz, ppm)  $\delta$  7.71 (dd, 2H,  $J = 10.0$  Hz), 7.30-7.26 (m, 3H), 6.96 (d, 2H,  $J = 10.0$  Hz), 6.88 (d, 2H,  $J = 10.0$  Hz), 2.22 (s, 3H), 2.16 (s, 3H).  $^{13}\text{C}$  NMR ( $\text{CDCl}_3$ , 125 MHz, ppm)  $\delta$  151.3, 149.6, 134.9, 134.7, 131.1, 129.7, 128.6, 127.8, 125.5, 103.4, 20.9, 10.7. HRMS  $m/z$  calcd. for  $\text{C}_{17}\text{H}_{17}\text{N}_2\text{S}$   $[\text{M}+\text{H}]^+$ : 281.1107, found: 281.1110.

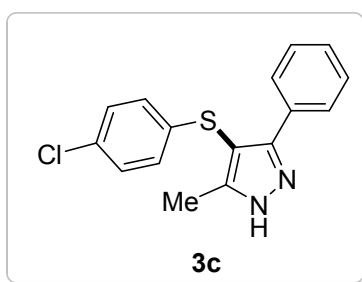

**4-(4-Chlorophenylthio)-5-methyl-3-phenyl-1H-pyrazole (3c).** Eluent petroleum ether/ethyl acetate (4:1). Yellow solid, 52 mg, 87% yield. (petroleum ether/ethyl acetate = 3:1, Rf= 0.4).  $^1\text{H}$  NMR ( $\text{CDCl}_3$ , 500 MHz, ppm)  $\delta$  7.74 (dd, 2H,  $J = 10.0$  Hz), 7.38-7.35 (m, 3H), 7.18 (d, 2H,  $J = 10.0$  Hz), 6.97 (d, 2H,  $J = 10.0$  Hz), 2.23 (s, 3H).  $^{13}\text{C}$  NMR ( $\text{CDCl}_3$ , 125 MHz, ppm)  $\delta$  151.3, 149.7, 137.1, 130.9, 130.8, 129.1, 128.8, 128.6, 127.6, 126.6, 102.6, 10.8. HRMS  $m/z$  calcd. for  $\text{C}_{16}\text{H}_{14}\text{ClN}_2\text{S}$   $[\text{M}+\text{H}]^+$ : 301.0561, found: 301.0564.

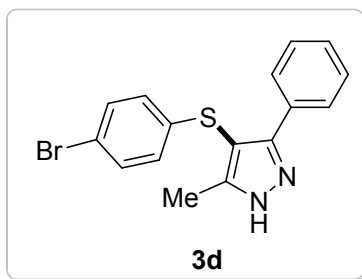

**4-(4-Bromophenylthio)-5-methyl-3-phenyl-1H-pyrazole (3d).** Eluent petroleum ether/ethyl acetate (4:1). Brown solid, 61 mg, 89% yield. (petroleum ether/ethyl

acetate = 3:1, Rf= 0.3).  $^1\text{H}$  NMR ( $\text{CDCl}_3$ , 500 MHz, ppm)  $\delta$  7.74 (dd, 2H,  $J = 10.0$  Hz), 7.38-7.36 (m, 3H), 7.32 (d, 2H,  $J = 10.0$  Hz), 6.91 (d, 2H,  $J = 10.0$  Hz), 2.23 (s, 3H).  $^{13}\text{C}$  NMR ( $\text{CDCl}_3$ , 125 MHz, ppm)  $\delta$  151.3, 149.8, 137.8, 131.9, 130.7, 128.8, 128.6, 127.6, 126.9, 118.5, 10.8. HRMS  $m/z$  calcd. for  $\text{C}_{16}\text{H}_{14}\text{BrN}_2\text{S}$   $[\text{M}+\text{H}]^+$ : 345.0061, 347.0041, found: 345.0052, 347.0059.

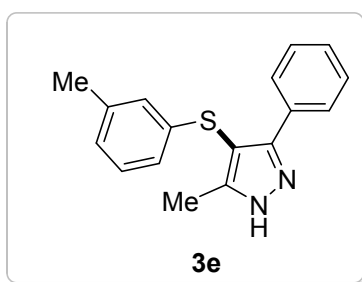

**5-Methyl-3-phenyl-4-(*m*-tolylthio)-1*H*-pyrazole (3e).** Eluent petroleum ether/ethyl acetate (4:1). Brown solid, 48 mg, 86% yield. (petroleum ether/ethyl acetate = 3:1, Rf= 0.3).  $^1\text{H}$  NMR ( $\text{CDCl}_3$ , 500 MHz, ppm)  $\delta$  7.78 (dd, 2H,  $J = 10.0$  Hz), 7.40-7.36 (m, 3H), 7.11 (t, 1H,  $J = 10.0$  Hz), 6.92 (d, 2H,  $J = 10.0$  Hz), 6.90 (s, 1H), 6.83 (d, 2H,  $J = 10.0$  Hz), 2.29 (s, 3H), 2.28 (s, 3H).  $^{13}\text{C}$  NMR ( $\text{CDCl}_3$ , 125 MHz, ppm)  $\delta$  150.8, 150.0, 138.8, 138.3, 130.9, 130.8, 128.8, 128.7, 128.6, 127.6, 125.9, 122.3, 103.0, 21.4, 10.9. HRMS  $m/z$  calcd. for  $\text{C}_{17}\text{H}_{17}\text{N}_2\text{S}$   $[\text{M}+\text{H}]^+$ : 281.1107, found: 281.1105.

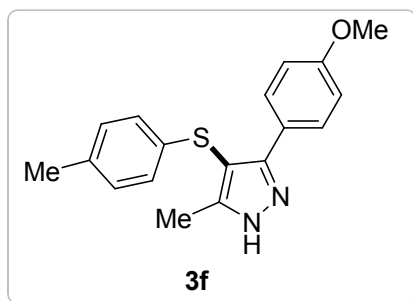

**3-(4-Methoxyphenyl)-5-methyl-4-(*p*-tolylthio)-1*H*-pyrazole (3f).** Eluent petroleum ether/ethyl acetate (4:1). Brown solid, 55 mg, 89% yield. (petroleum ether/ethyl

acetate = 3:1, R<sub>f</sub> = 0.3). <sup>1</sup>H NMR (CDCl<sub>3</sub>, 500 MHz, ppm) δ 12.00 (br, s, 1H), 7.71 (d, 2H, *J* = 5.0 Hz), 7.06 (d, 2H, *J* = 10.0 Hz), 6.99 (d, 2H, *J* = 10.0 Hz), 6.85 (d, 2H, *J* = 5.0 Hz), 3.80 (s, 3H), 2.32 (s, 3H), 2.23 (s, 3H). <sup>13</sup>C NMR (CDCl<sub>3</sub>, 125 MHz, ppm) δ 159.9, 150.9, 149.9, 135.2, 134.6, 129.8, 129.2, 125.5, 123.5, 113.9, 102.7, 55.2, 20.9, 10.9. HRMS *m/z* calcd. for C<sub>18</sub>H<sub>19</sub>N<sub>2</sub>OS [M+H]<sup>+</sup>: 311.1213, found: 311.1214.

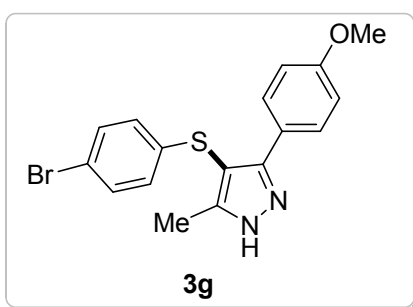

**4-(4-Bromophenylthio)-3-(4-methoxyphenyl)-5-methyl-1*H*-pyrazole (3g).** Eluent petroleum ether/ethyl acetate (4:1). Brown solid, 65 mg, 88% yield. (petroleum ether/ethyl acetate = 3:1, R<sub>f</sub> = 0.4). <sup>1</sup>H NMR (CDCl<sub>3</sub>, 500 MHz, ppm) δ 12.36 (br, s, 1H), 7.66 (d, 2H, *J* = 10.0 Hz), 7.31 (d, 2H, *J* = 10.0 Hz), 6.91 (d, 2H, *J* = 5.0 Hz), 6.84 (d, 2H, *J* = 5.0 Hz), 3.80 (s, 3H), 2.19 (s, 3H). <sup>13</sup>C NMR (CDCl<sub>3</sub>, 125 MHz, ppm) δ 160.0, 151.0, 149.9, 138.0, 132.0, 129.1, 126.8, 123.1, 118.5, 114.0, 101.7, 55.2, 10.8. HRMS *m/z* calcd. for C<sub>17</sub>H<sub>16</sub>BrN<sub>2</sub>OS [M+H]<sup>+</sup>: 376.0245, 378.0224, found: 376.0047, 378.0231.

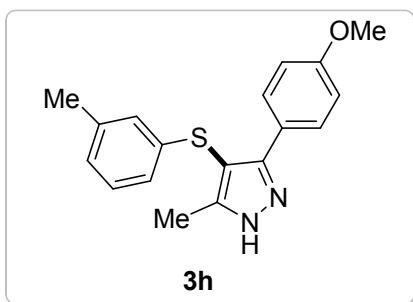

**3-(4-Methoxyphenyl)-5-methyl-4-(*m*-tolylthio)-1*H*-pyrazole (3h).** Eluent petroleum

ether/ethyl acetate (4:1). Brown solid, 52 mg, 84% yield. (petroleum ether/ethyl acetate = 3:1, R<sub>f</sub> = 0.5). <sup>1</sup>H NMR (CDCl<sub>3</sub>, 500 MHz, ppm) δ 11.8 (br, s, 1H), 7.71 (d, 2H, *J* = 5.0 Hz), 7.13 (t, 1H, *J* = 10.0 Hz), 6.98-6.93 (m, 2H), 6.84 (d, 3H, *J* = 5.0 Hz), 3.80 (s, 3H), 2.30 (s, 3H), 2.23 (s, 3H). <sup>13</sup>C NMR (CDCl<sub>3</sub>, 125 MHz, ppm) δ 159.9, 151.1, 150.0, 138.8, 138.6, 129.2, 128.9, 125.9, 125.8, 123.5, 122.3, 113.9, 102.3, 55.2, 21.5, 10.9. HRMS *m/z* calcd. for C<sub>18</sub>H<sub>19</sub>N<sub>2</sub>OS [M+H]<sup>+</sup>: 311.1213, found: 311.1214.

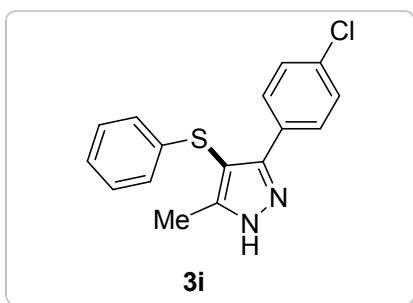

**3-(4-Chlorophenyl)-5-methyl-4-(phenylthio)-1H-pyrazole (3i).** Eluent petroleum ether/ethyl acetate (4:1). Yellow solid, 83 mg, 92% yield. (petroleum ether/ethyl acetate = 3:1, R<sub>f</sub> = 0.4). <sup>1</sup>H NMR (CDCl<sub>3</sub>, 500 MHz, ppm) δ 7.70 (d, 2H, *J* = 10.0 Hz), 7.29-7.23 (m, 4H), 7.14 (t, 1H, *J* = 10.0 Hz), 7.06 (d, 2H, *J* = 10.0 Hz), 2.22 (s, 3H). <sup>13</sup>C NMR (CDCl<sub>3</sub>, 125 MHz, ppm) δ 151.2, 149.1, 138.2, 134.7, 129.4, 129.1, 129.0, 128.7, 125.4, 125.2, 103.2, 10.5. HRMS *m/z* calcd. for C<sub>16</sub>H<sub>14</sub>ClN<sub>2</sub>S [M+H]<sup>+</sup>: 301.0561, found: 301.0564.

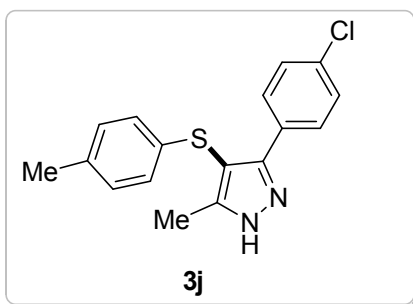



**3-(4-Chlorophenyl)-5-methyl-4-(*p*-tolylthio)-1*H*-pyrazole (3j).** Eluent petroleum ether/ethyl acetate (4:1). Brown solid, 53 mg, 85% yield. (petroleum ether/ethyl acetate = 3:1, R<sub>f</sub> = 0.3). <sup>1</sup>H NMR (CDCl<sub>3</sub>, 500 MHz, ppm) δ 7.78 (d, 2H, *J* = 10.0 Hz), 7.34 (d, 2H, *J* = 10.0 Hz), 7.04 (d, 2H, *J* = 10.0 Hz), 6.94 (d, 2H, *J* = 10.0 Hz), 2.34 (s, 3H), 2.29 (s, 3H). <sup>13</sup>C NMR (CDCl<sub>3</sub>, 125 MHz, ppm) δ 50.9, 148.8, 135.0, 134.5, 129.8, 129.4, 129.0, 128.7, 128.6, 128.5, 103.7, 20.9, 10.6. HRMS *m/z* calcd. for C<sub>17</sub>H<sub>16</sub>ClN<sub>2</sub>S [M+H]<sup>+</sup>: 315.0717, found: 315.0719.

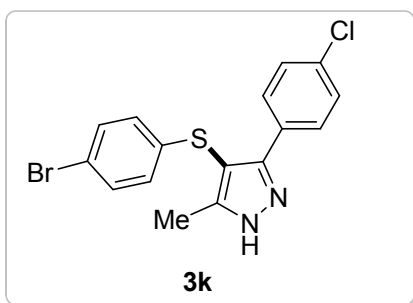

**4-(4-Bromophenylthio)-3-(4-chlorophenyl)-5-methyl-1*H*-pyrazole (3k).** Eluent petroleum ether/ethyl acetate (4:1). Brown solid, 65 mg, 86% yield. (petroleum ether/ethyl acetate = 3:1, R<sub>f</sub> = 0.5). <sup>1</sup>H NMR (CDCl<sub>3</sub>, 500 MHz, ppm) δ 7.71 (d, 2H, *J* = 10.0 Hz), 7.33 (dd, 4H, *J* = 10.0 Hz), 6.98 (d, 2H, *J* = 10.0 Hz), 2.28 (s, 3H). <sup>13</sup>C NMR (CDCl<sub>3</sub>, 125 MHz, ppm) δ 151.1, 148.8, 137.4, 134.8, 132.0, 129.6, 128.8, 128.7, 126.9, 125.6, 118.7, 10.6. HRMS *m/z* calcd. for C<sub>16</sub>H<sub>13</sub>BrClN<sub>2</sub>S [M+H]<sup>+</sup>: 378.9671, 380.9651, found: 378.9680, 380.9654.

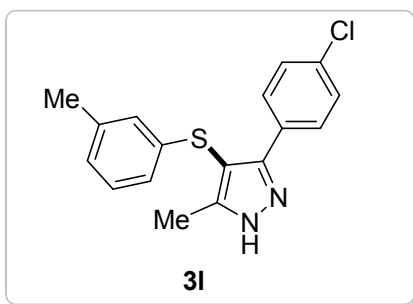

**3-(4-Chlorophenyl)-5-methyl-4-(*m*-tolylthio)-1*H*-pyrazole (3l).** Eluent petroleum ether/ethyl acetate (4:1). Brown solid, 53 mg, 85% yield. (petroleum ether/ethyl acetate = 3:1, R<sub>f</sub>= 0.4). <sup>1</sup>H NMR (CDCl<sub>3</sub>, 500 MHz, ppm) δ 10.3 (br, s, 1H), 7.71 (d, 2H, *J* = 10.0 Hz), 7.29 (d, 2H, *J* = 10.0 Hz), 7.12 (dd, 1H, *J* = 5.0 Hz, *J* = 10.0 Hz), 6.94 (d, 1H, *J* = 10.0 Hz), 6.90 (s, 1H), 6.80 (d, 2H, *J* = 10.0 Hz), 2.29 (s, 3H), 2.23 (s, 3H). <sup>13</sup>C NMR (CDCl<sub>3</sub>, 125 MHz, ppm) δ 151.1, 150.0, 138.9, 137.9, 134.6, 129.7, 129.0, 128.9, 128.7, 126.1, 125.9, 122.3, 103.3, 21.5, 10.6. HRMS *m/z* calcd. for C<sub>17</sub>H<sub>16</sub>ClN<sub>2</sub>S [M+H]<sup>+</sup>: 315.0717, found: 315.0719.

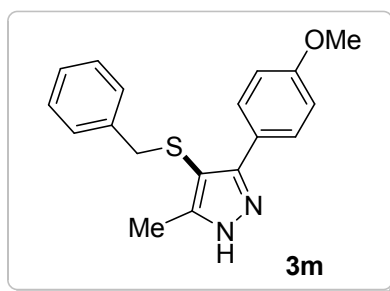

**3-(4-Methoxyphenyl)-5-methyl-4-(phenethylthio)-1*H*-pyrazole (3m).** Eluent petroleum ether/ethyl acetate (4:1). Yellow solid, 42 mg, 65% yield. (petroleum ether/ethyl acetate = 3:1, R<sub>f</sub>= 0.4). <sup>1</sup>H NMR (CDCl<sub>3</sub>, 500 MHz, ppm) δ 11.7 (br, s, 1H), 7.87 (d, 2H, *J* = 10.0 Hz), 7.28-7.25 (m, 2H), 7.20 (t, 1H, *J* = 10.0 Hz), 7.06 (d, 2H, *J* = 10.0 Hz), 6.91 (d, 2H, *J* = 10.0 Hz), 6.80 (d, 2H, *J* = 10.0 Hz), 3.86 (s, 3H), 2.76 (d, 2H, *J* = 10.0 Hz), 2.70 (d, 2H, *J* = 10.0 Hz), 2.28 (s, 3H). <sup>13</sup>C NMR (CDCl<sub>3</sub>, 125 MHz, ppm) δ 159.7, 150.0, 148.5, 140.4, 129.2, 128.5, 128.4, 126.2, 124.2, 113.8, 105.4, 55.2, 37.5, 36.0, 10.9. HRMS *m/z* calcd. for C<sub>19</sub>H<sub>21</sub>N<sub>2</sub>OS [M+H]<sup>+</sup>: 325.1369, found: 325.1365.

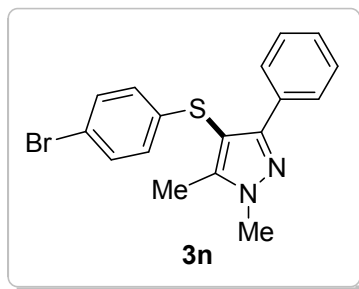

**4-(4-Bromophenylthio)-1,5-dimethyl-3-phenyl-1H-pyrazole (3n).** Eluent petroleum ether/ethyl acetate (4:1). White solid, 64 mg, 90% yield. (petroleum ether/ethyl acetate = 3:1, R<sub>f</sub> = 0.3). <sup>1</sup>H NMR (CDCl<sub>3</sub>, 500 MHz, ppm) δ 7.85 (d, 2H, *J* = 10.0 Hz), 7.38-7.32 (m, 5H), 6.92 (d, 2H, *J* = 10.0 Hz), 3.94 (s, 3H), 2.33 (d 2H, *J* = 10.0 Hz). <sup>13</sup>C NMR (CDCl<sub>3</sub>, 125 MHz, ppm) δ 152.8, 145.2, 138.3, 132.5, 131.9, 128.3, 128.1, 127.5, 126.8, 118.4, 101.9, 37.2, 10.0. HRMS *m/z* calcd. for C<sub>17</sub>H<sub>16</sub>BrN<sub>2</sub>S [M+H]<sup>+</sup>: 359.0212, 361.0197, found: 359.0215, 361.0219.

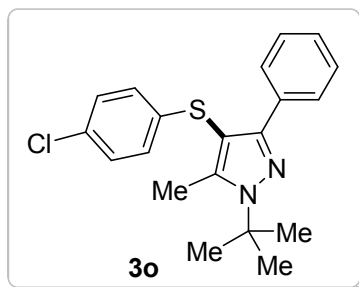

**5-*tert*-Butyl-4-(4-chlorophenylthio)-3-phenyl-1H-pyrazole (3o).** Eluent petroleum ether/ethyl acetate (4:1). White solid, 53 mg, 77% yield. (petroleum ether/ethyl acetate = 3:1, R<sub>f</sub> = 0.3). <sup>1</sup>H NMR (CDCl<sub>3</sub>, 500 MHz, ppm) δ 7.32 (d, 2H, *J* = 10.0 Hz), 7.35-7.33 (m, 3H), 7.17 (d, 2H, *J* = 10.0 Hz), 6.95 (d, 2H, *J* = 10.0 Hz), 1.46 (s, 9H). <sup>13</sup>C NMR (CDCl<sub>3</sub>, 125 MHz, ppm) δ 1148.1, 141.0, 127.0, 125.9, 123.9, 123.8, 122.3, 120.6, 118.5, 114.4, 114.2, 113.8, 58.5, 18.5, 15.3. HRMS *m/z* calcd. for C<sub>19</sub>H<sub>20</sub>ClN<sub>2</sub>S [M+H]<sup>+</sup>: 343.1030, found: 343.1038.

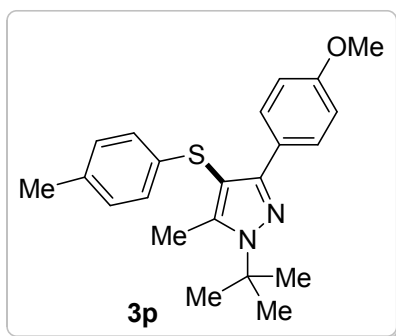

**5-*tert*-Butyl-3-(4-methoxyphenyl)-4-(*p*-tolylthio)-1*H*-pyrazole (3p).** Eluent petroleum ether/ethyl acetate (5:1). White solid, 57 mg, 82% yield. (petroleum ether/ethyl acetate = 3:1,  $R_f$  = 0.4).  $^1\text{H}$  NMR (DMSO- $d_6$ , 500 MHz, ppm)  $\delta$  13.1 (br, s, 1H), 7.64 (d, 2H,  $J$  = 5.0 Hz), 7.04 (d, 2H,  $J$  = 10.0 Hz), 6.92 (d, 2H,  $J$  = 5.0 Hz), 6.83 (d, 2H,  $J$  = 10.0 Hz), 3.78 (s, 3H), 2.20 (s, 3H), 1.34 (s, 9H).  $^{13}\text{C}$  NMR (DMSO- $d_6$ , 125 MHz, ppm)  $\delta$  159.7, 158.6, 147.8, 140.9, 131.5, 128.9, 124.9, 121.5, 120.6, 114.3, 113.6, 55.3, 44.7, 30.1, 27.4. HRMS  $m/z$  calcd. for  $\text{C}_{21}\text{H}_{25}\text{N}_2\text{OS}$   $[\text{M}+\text{H}]^+$ : 353.1682, found: 353.1685.

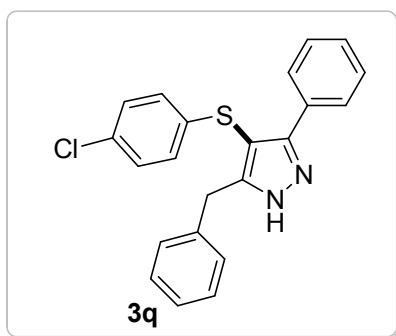

**5-Benzyl-4-(4-chlorophenylthio)-3-phenyl-1*H*-pyrazole (3q).** Eluent petroleum ether/ethyl acetate (4:1). Yellow solid, 59 mg, 78% yield. (petroleum ether/ethyl acetate = 3:1,  $R_f$  = 0.3).  $^1\text{H}$  NMR ( $\text{CDCl}_3$ , 500 MHz, ppm)  $\delta$  7.73 (d, 2H,  $J$  = 10.0 Hz), 7.36-7.33 (m, 3H), 7.21-7.18 (m, 3H), 7.15 (d, 2H,  $J$  = 10.0 Hz), 7.11 (d, 2H,  $J$  = 10.0 Hz), 6.89 (d, 2H,  $J$  = 10.0 Hz), 4.00 (s, 2H).  $^{13}\text{C}$  NMR ( $\text{CDCl}_3$ , 125 MHz, ppm)  $\delta$

1152.9, 150.7, 137.4, 136.9, 130.7, 130.3, 128.93, 128.91, 128.8, 128.7, 128.6, 127.5, 126.63, 126.61, 102.4, 31.9. HRMS  $m/z$  calcd. for  $C_{22}H_{18}ClN_2S$   $[M+H]^+$ : 377.0874, found: 377.0883.

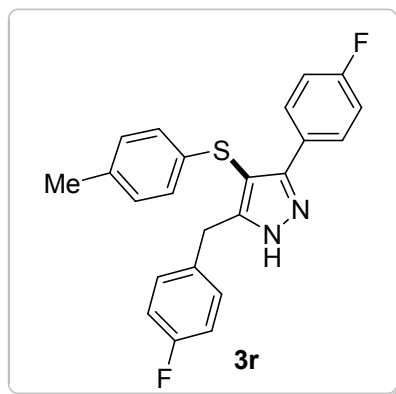

**5-(4-Fluorobenzyl)-3-(4-fluorophenyl)-4-(p-tolylthio)-1H-pyrazole (3r).** Eluent petroleum ether/ethyl acetate (5:1). White solid, 63 mg, 80% yield. (petroleum ether/ethyl acetate = 3:1,  $R_f$  = 0.3).  $^1H$  NMR ( $CDCl_3$ , 500 MHz, ppm)  $\delta$  7.70 (d, 2H,  $J$  = 10.0 Hz), 7.10 (d, 2H,  $J$  = 5.0 Hz), 7.00 (d, 2H,  $J$  = 10.0 Hz), 6.90 (d, 2H,  $J$  = 5.0 Hz), 6.88 (d, 2H,  $J$  = 10.0 Hz), 6.77 (d, 2H,  $J$  = 10.0 Hz), 3.97 (s, 2H), 2.29 (s, 2H).  $^{13}C$  NMR ( $CDCl_3$ , 125 MHz, ppm)  $\delta$  161.6 (d,  $J_{CF}$  = 245.0 Hz), 159.9, 158.2, 134.1 (d,  $J_{CF}$  = 7.5 Hz), 134.6, 129.9, 129.8, 129.6, 129.3, 128.8, 125.5, 123.2, 114.0, 113.98, 113.94, 102.4, 31.1, 20.9. HRMS  $m/z$  calcd. for  $C_{23}H_{19}F_2N_2S$   $[M+H]^+$ : 393.1232, found: 393.1236.

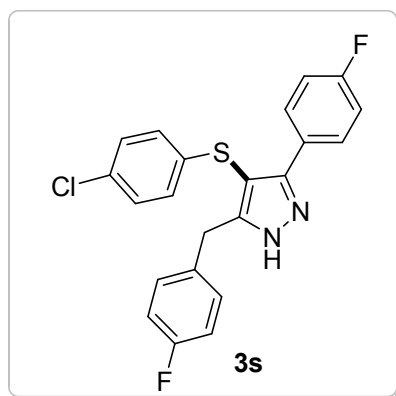

**4-(4-Chlorophenylthio)-5-(4-fluorobenzyl)-3-(4-fluorophenyl)-1H-pyrazole (3s).**

Eluent petroleum ether/ethyl acetate (4:1). Yellow solid, 62 mg, 75% yield. (petroleum ether/ethyl acetate = 3:1, R<sub>f</sub> = 0.3). <sup>1</sup>H NMR (CDCl<sub>3</sub>, 500 MHz, ppm) δ 7.64 (d, 2H, *J* = 10.0 Hz), 7.09 (d, 2H, *J* = 10.0 Hz), 7.04 (d, 2H, *J* = 10.0 Hz), 6.85 (dd, 4H, *J* = 5.0 Hz), 6.69 (d, 2H, *J* = 10.0 Hz), 3.92 (s, 2H). <sup>13</sup>C NMR (CDCl<sub>3</sub>, 125 MHz, ppm) δ 160.1 (d, *J*<sub>CF</sub> = 243.0 Hz), 158.2, 153.5, 150.3, 137.1 (d, *J*<sub>CF</sub> = 7.5 Hz), 130.5, 129.8, 129.6, 128.9, 128.8, 126.5, 122.7, 114.1, 113.8, 101.4, 31.2. HRMS *m/z* calcd. for C<sub>22</sub>H<sub>16</sub>ClF<sub>2</sub>N<sub>2</sub>S [M+H]<sup>+</sup>: 413.0685, found: 413.0689.

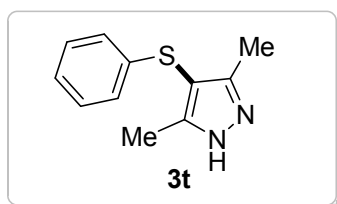

**3,5-Dimethyl-4-(phenylthio)-1H-pyrazole (3t).** Eluent petroleum ether/ethyl acetate (4:1). White solid, 38 mg, 93% yield. (petroleum ether/ethyl acetate = 3:1, R<sub>f</sub> = 0.3).

<sup>1</sup>H NMR (CDCl<sub>3</sub>, 500 MHz, ppm) δ 7.24 (dd, 2H, *J* = 5.0 Hz, *J* = 10.0 Hz), 7.12 (dd, 2H, *J* = 10.0 Hz), 7.04 (d, 2H, *J* = 10.0 Hz), 2.36 (s, 6H). <sup>13</sup>C NMR (CDCl<sub>3</sub>, 125 MHz, ppm) δ 148.9, 138.6, 128.9, 125.3, 124.8, 104.2, 103.7, 11.1. HRMS *m/z* calcd. for C<sub>11</sub>H<sub>13</sub>N<sub>2</sub>S [M+H]<sup>+</sup>: 205.0794, found: 205.0799.

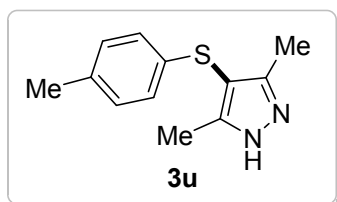

**3,5-Dimethyl-4-(p-tolylthio)-1H-pyrazole (3u).** Eluent petroleum ether/ethyl acetate (4:1). White solid, 41 mg, 95% yield. (petroleum ether/ethyl acetate = 3:1, R<sub>f</sub> = 0.3).

$^1\text{H}$  NMR ( $\text{CDCl}_3$ , 500 MHz, ppm)  $\delta$  7.08 (d, 2H,  $J = 5.0$  Hz,  $J = 10.0$  Hz), 6.97 (d, 2H,  $J = 5.0$  Hz), 2.37 (s, 6H), 2.33 (s, 3H).  $^{13}\text{C}$  NMR ( $\text{CDCl}_3$  125 MHz, ppm)  $\delta$  148.8, 135.0, 134.7, 129.7, 125.6, 104.3, 20.9, 11.2. HRMS  $m/z$  calcd. for  $\text{C}_{12}\text{H}_{15}\text{N}_2\text{S}$   $[\text{M}+\text{H}]^+$ : 219.0950, found: 219.0959.

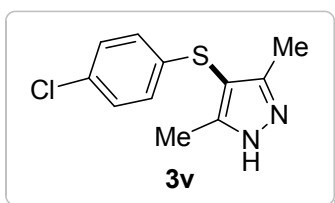

**4-(4-Chlorophenylthio)-3,5-dimethyl-1H-pyrazole (3v).** Eluent petroleum ether/ethyl acetate (4:1). Yellow solid, 43 mg, 91% yield. (petroleum ether/ethyl acetate = 3:1,  $R_f = 0.3$ ).  $^1\text{H}$  NMR ( $\text{DMSO}-d_6$ , 500 MHz, ppm)  $\delta$  10.9 (br, s, 1H), 7.19 (d, 2H,  $J = 10.0$  Hz), 6.94 (d, 2H,  $J = 10.0$  Hz), 2.33 (s, 6H).  $^{13}\text{C}$  NMR ( $\text{DMSO}-d_6$ , 125 MHz, ppm)  $\delta$  148.9, 137.1, 130.7, 129.0, 126.6, 103.5, 11.1. HRMS  $m/z$  calcd. for  $\text{C}_{11}\text{H}_{12}\text{ClN}_2\text{S}$   $[\text{M}+\text{H}]^+$ : 239.0404, found: 239.0408.

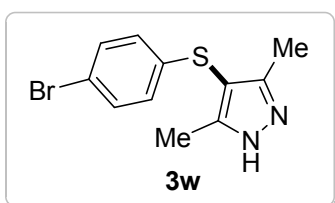

**4-(4-Bromophenylthio)-3,5-dimethyl-1H-pyrazole (3w).** Eluent petroleum ether/ethyl acetate (4:1). Yellow solid, 52 mg, 93% yield. (petroleum ether/ethyl acetate = 3:1,  $R_f = 0.3$ ).  $^1\text{H}$  NMR ( $\text{CDCl}_3$ , 500 MHz, ppm)  $\delta$  12.5 (br, s, 1H), 7.34 (d, 2H,  $J = 10.0$  Hz), 6.90 (d, 2H,  $J = 10.0$  Hz), 2.35 (s, 6H).  $^{13}\text{C}$  NMR ( $\text{CDCl}_3$ , 125 MHz, ppm)  $\delta$  148.9, 137.9, 131.9, 126.9, 118.4, 103.3, 11.1. HRMS  $m/z$  calcd. for  $\text{C}_{11}\text{H}_{12}\text{BrN}_2\text{S}$   $[\text{M}+\text{H}]^+$ : 282.9905, 284.9884, found: 282.9914, 284.9890.

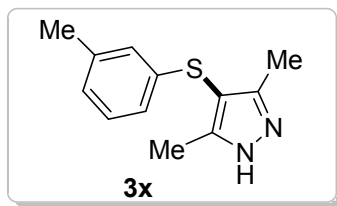

**3,5-Dimethyl-4-(*m*-tolylthio)-1*H*-pyrazole (3x).** Eluent petroleum ether/ethyl acetate (4:1). Yellow solid, 40 mg, 92% yield. (petroleum ether/ethyl acetate = 3:1, R<sub>f</sub>= 0.3). <sup>1</sup>H NMR (CDCl<sub>3</sub>, 500 MHz, ppm) δ 12.0 (br, s, 1H), 7.24 (dd, 2H, *J* = 5.0 Hz, *J* = 10.0 Hz), 6.94 (d, 2H, *J* = 10.0 Hz), 6.83 (d, 2H, *J* = 5.0 Hz), 2.37 (s, 6H), 2.32 (s, 3H). <sup>13</sup>C NMR (CDCl<sub>3</sub>, 125 MHz, ppm) δ 148.9, 138.7, 138.3, 128.8, 125.9, 125.8, 122.4, 21.5, 11.2. HRMS *m/z* calcd. for C<sub>12</sub>H<sub>15</sub>N<sub>2</sub>S [M+H]<sup>+</sup>: 219.0950, found: 219.0959.

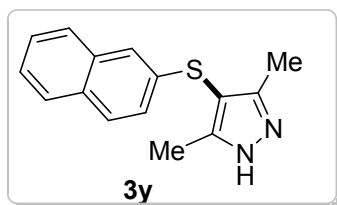

**3,5-Dimethyl-4-(naphthalen-2-ylthio)-1*H*-pyrazole (3y).** Eluent petroleum ether/ethyl acetate (4:1). White solid, 48 mg, 96% yield. (petroleum ether/ethyl acetate = 3:1, R<sub>f</sub>= 0.3). <sup>1</sup>H NMR (CDCl<sub>3</sub>, 500 MHz, ppm) δ 12.1(br, s, 1H), 7.82 (d, 1H, *J* = 10.0 Hz), 7.77 (d, 1H, *J* = 10.0 Hz), 7.71 (d, 1H, *J* = 5.0 Hz), 7.49-7.44 (m, 3H), 7.31 (d, 1H, *J* = 10.0 Hz), 2.46 (s, 6H). <sup>13</sup>C NMR (CDCl<sub>3</sub>, 125 MHz, ppm) δ 149.0, 144.5, 136.3, 133.9, 131.4, 128.6, 127.8, 126.9, 126.6, 125.2, 124.3, 122.7, 104.2, 103.4, 12.3. HRMS *m/z* calcd. for C<sub>15</sub>H<sub>15</sub>N<sub>2</sub>S [M+H]<sup>+</sup>: 255.0950, found: 255.0956.



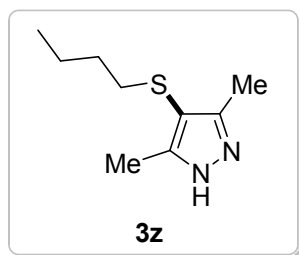

**4-(Butylthio)-3,5-dimethyl-1H-pyrazole (3z).** Eluent petroleum ether/ethyl acetate (4:1). Yellow solid, 23 mg, 62% yield. (petroleum ether/ethyl acetate = 3:1, R<sub>f</sub> = 0.3). <sup>1</sup>H NMR (CDCl<sub>3</sub>, 500 MHz, ppm) δ 10.6 (br, s, 1H), 2.51 (t, 2H, *J* = 5.0 Hz, *J* = 10.0 Hz), 2.35 (s, 6H), 1.48-1.40 (m, 4H), 0.90 (t, 3H, *J* = 5.0 Hz, *J* = 10.0 Hz). <sup>13</sup>C NMR (CDCl<sub>3</sub>, 125 MHz, ppm) δ 147.8, 146.2, 106.7, 36.1, 31.7, 21.7, 13.7, 12.9, 11.2. HRMS *m/z* calcd. for C<sub>9</sub>H<sub>17</sub>N<sub>2</sub>S [M+H]<sup>+</sup>: 185.1107, found: 185.1101.

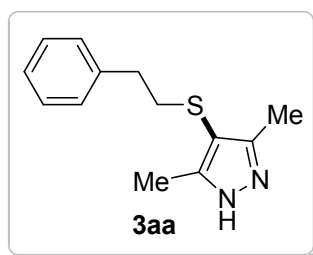

**3,5-Dimethyl-4-(phenethylthio)-1H-pyrazole (3aa).** Eluent petroleum ether/ethyl acetate (4:1). White solid, 83 mg, 94% yield. (petroleum ether/ethyl acetate = 3:1, R<sub>f</sub> = 0.4). <sup>1</sup>H NMR (CDCl<sub>3</sub>, 500 MHz, ppm) δ 11.40 (br, s, 1H), 7.32 (dd, 2H, *J* = 5.0 Hz, *J* = 10.0 Hz), 7.24 (d, 2H, *J* = 5.0 Hz, *J* = 10.0 Hz), 7.18 (d, 1H, *J* = 5.0 Hz), 2.86-2.79 (m, 4H), 2.41 (s, 6H). <sup>13</sup>C NMR (CDCl<sub>3</sub>, 125 MHz, ppm) δ 148.1, 140.5, 128.5, 128.4, 126.3, 106.5, 37.5, 36.4, 11.3. HRMS *m/z* calcd. for C<sub>13</sub>H<sub>17</sub>N<sub>2</sub>S [M+H]<sup>+</sup>: 233.1107, found: 233.1105.

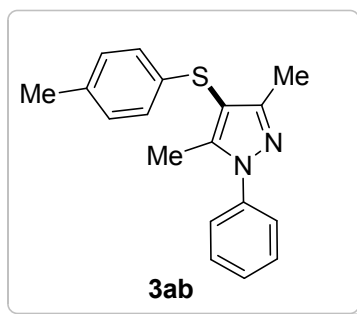

**3,5-Dimethyl-1-phenyl-4-(*p*-tolylthio)-1*H*-pyrazole (3ab).** Eluent petroleum ether/ethyl acetate (30:1). White solid, 48 mg, 82% yield. (petroleum ether/ethyl acetate = 25:1, R<sub>f</sub> = 0.3). <sup>1</sup>H NMR (CDCl<sub>3</sub>, 500 MHz, ppm) δ 7.53-7.49 (m, 4H), 7.43-7.40 (m, 1H), 7.08 (d, 2H, *J* = 10.0 Hz, *J* = 10.0 Hz), 7.01 (d, 2H, *J* = 10.0 Hz), 2.38 (s, 3H), 2.33 (s, 3H), 2.32 (s, 3H). <sup>13</sup>C NMR (CDCl<sub>3</sub>, 125 MHz, ppm) δ 153.1, 144.0, 139.8, 134.8, 134.7, 129.7, 129.2, 127.8, 125.8, 124.7, 106.7, 20.9, 12.1, 11.6. HRMS *m/z* calcd. for C<sub>18</sub>H<sub>19</sub>N<sub>2</sub>S [M+H]<sup>+</sup>: 295.1263, found: 295.1269.

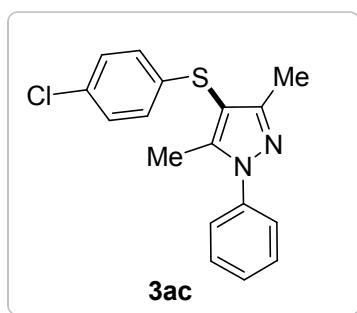

**4-(4-Chlorophenylthio)-3,5-dimethyl-1-phenyl-1*H*-pyrazole (3ac).** Eluent petroleum ether/ethyl acetate (30:1). White solid, 54 mg, 86% yield. (petroleum ether/ethyl acetate = 25:1, R<sub>f</sub> = 0.3). <sup>1</sup>H NMR CDCl<sub>3</sub> (, 500 MHz, ppm) δ 7.53-7.49 (m, 4H), 7.44-7.41 (m, 1H), 7.22 (d, 2H, *J* = 10.0 Hz, *J* = 10.0 Hz), 7.01 (d, 2H, *J* = 10.0 Hz), 2.36 (s, 3H), 2.30 (s, 3H). <sup>13</sup>C NMR (CDCl<sub>3</sub>, 125 MHz, ppm) δ 153.1, 144.2, 139.7, 137.0, 130.8, 129.2, 129.0, 127.9, 126.7, 124.7, 105.8, 12.1, 11.5. HRMS *m/z* calcd. for C<sub>17</sub>H<sub>16</sub>ClN<sub>2</sub>S [M+H]<sup>+</sup>: 315.0717, found: 315.0713.

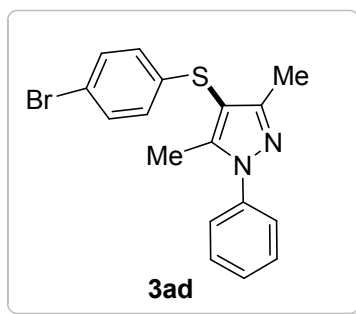

**4-(4-Bromophenylthio)-3,5-dimethyl-1-phenyl-1H-pyrazole (3ad).** Eluent petroleum ether/ethyl acetate (30:1). White solid, 61 mg, 85% yield. (petroleum ether/ethyl acetate = 25:1, R<sub>f</sub> = 0.3). <sup>1</sup>H NMR (CDCl<sub>3</sub>, 500 MHz, ppm) δ 7.52-7.49 (m, 4H), 7.44-7.42 (m, 1H), 7.37 (d, 2H, *J* = 10.0 Hz), 6.95 (d, 2H, *J* = 10.0 Hz), 2.36 (s, 3H), 2.30 (s, 3H). <sup>13</sup>C NMR (CDCl<sub>3</sub>, 125 MHz, ppm) δ 153.1, 144.2, 139.7, 137.7, 131.9, 129.2, 128.0, 127.0, 126.7, 124.7, 118.5, 105.6, 12.1, 11.5. HRMS *m/z* calcd. for C<sub>17</sub>H<sub>16</sub>BrN<sub>2</sub>S [M+H]<sup>+</sup>: 359.0218, 361.0197, found: 359.0215, 361.0194.

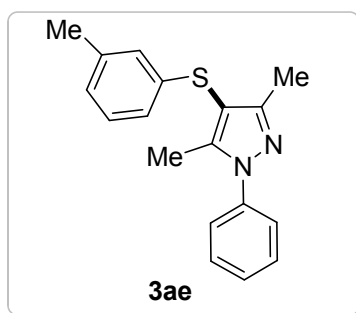

**3,5-Dimethyl-1-phenyl-4-(*m*-tolylthio)-1H-pyrazole (3ae).** Eluent petroleum ether/ethyl acetate (30:1). White solid, 52 mg, 88% yield. (petroleum ether/ethyl acetate = 25:1, R<sub>f</sub> = 0.3). <sup>1</sup>H NMR (CDCl<sub>3</sub>, 500 MHz, ppm) δ 7.52-7.51 (m, 4H), 7.43-7.41 (m, 1H), 7.15 (dd, 1H, *J* = 5.0 Hz, *J* = 10.0 Hz), 6.95 (d, 2H, *J* = 10.0 Hz), 6.86 (d, 1H, *J* = 10.0 Hz), 2.38 (s, 3H), 2.33 (s, 3H), 2.32 (s, 3H). <sup>13</sup>C NMR (CDCl<sub>3</sub>, 125 MHz, ppm) δ 153.2, 144.1, 139.8, 138.7, 138.1, 129.2, 128.8, 127.8, 126.0, 125.9, 124.7, 122.5, 106.2, 21.5, 12.1, 11.6. HRMS *m/z* calcd. for C<sub>18</sub>H<sub>19</sub>N<sub>2</sub>S [M+H]<sup>+</sup>:

295.1263, found: 295.1269.

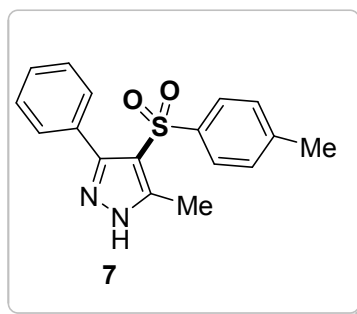

**5-Methyl-3-phenyl-4-tosyl-1H-pyrazole (7).** Eluent petroleum ether/ethyl acetate (3:1). White solid, 68mg, 73% yield. (petroleum ether/ethyl acetate = 3:1, Rf= 0.2).  $^1\text{H}$  NMR (DMSO- $d_6$ , 500 MHz, ppm)  $\delta$  7.42-7.38 (m, 5H), 7.34-7.31 (m, 2H), 7.09 (d, 2H,  $J = 10.0$  Hz), 2.33 (s, 3H), 2.20 (s, 3H).  $^{13}\text{C}$  NMR (DMSO- $d_6$ , 125 MHz, ppm)  $\delta$  171.4, 150.6, 145.7, 143.6, 140.0, 130.2, 129.9, 129.35, 129.31, 128.0, 126.7, 117.8, 21.8, 11.3. HRMS  $m/z$  calcd. for  $\text{C}_{14}\text{H}_{10}\text{N}_2\text{O}_2\text{S}$   $[\text{M}+\text{H}]^+$ : 313.1005, found: 313.1009.

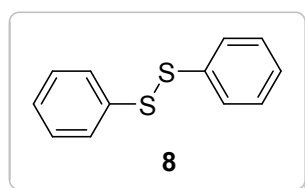

**1,2-Diphenyldisulfane (8).** Eluent petroleum ether/ethyl acetate (50:1). White solid, 25.6 mg, 98% yield. (petroleum ether/ethyl acetate = 50:1, Rf= 0.8).  $^1\text{H}$  NMR (DMSO- $d_6$ , 500 MHz, ppm)  $\delta$  7.55 (d, 4H,  $J = 10.0$  Hz), 7.34 (dd, 4H,  $J = 5.0$  Hz,  $J = 10.0$  Hz), 7.27 (dd, 2H,  $J = 5.0$  Hz,  $J = 10.0$  Hz).  $^{13}\text{C}$  NMR (DMSO- $d_6$ , 125 MHz, ppm)  $\delta$  137.1, 129.1, 127.5, 127.2.

## Reference

- (a) J. Wen, Y. Fu, R.-Y. Zhang, J. Zhang, S.-Y. Chen, X.-Q. Yu, *Tetrahedron.*, 2011, **67**, 9618; (b) L. Wang, X. Yu, X. Feng, M. Bao, *J. Org. Chem.*, 2013, **78**, 1693.
- D. C. Mohan, S. N. Rao, C. Ravi, S. Adimurthy, *Asian J. Org. Chem.*, 2014, **3**, 609.

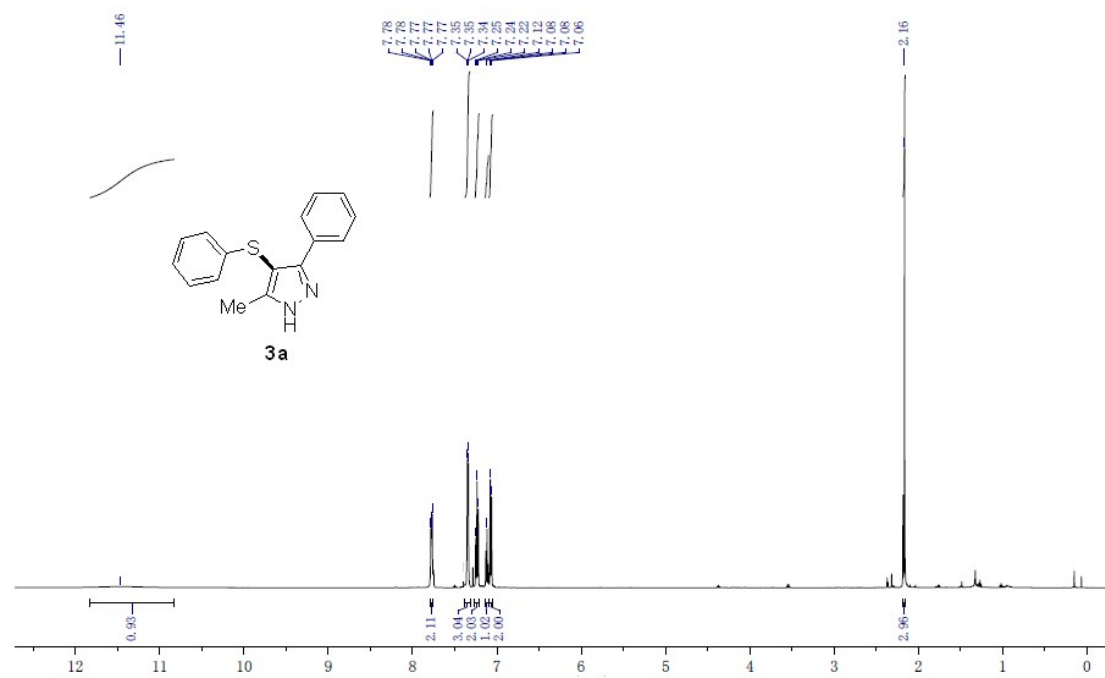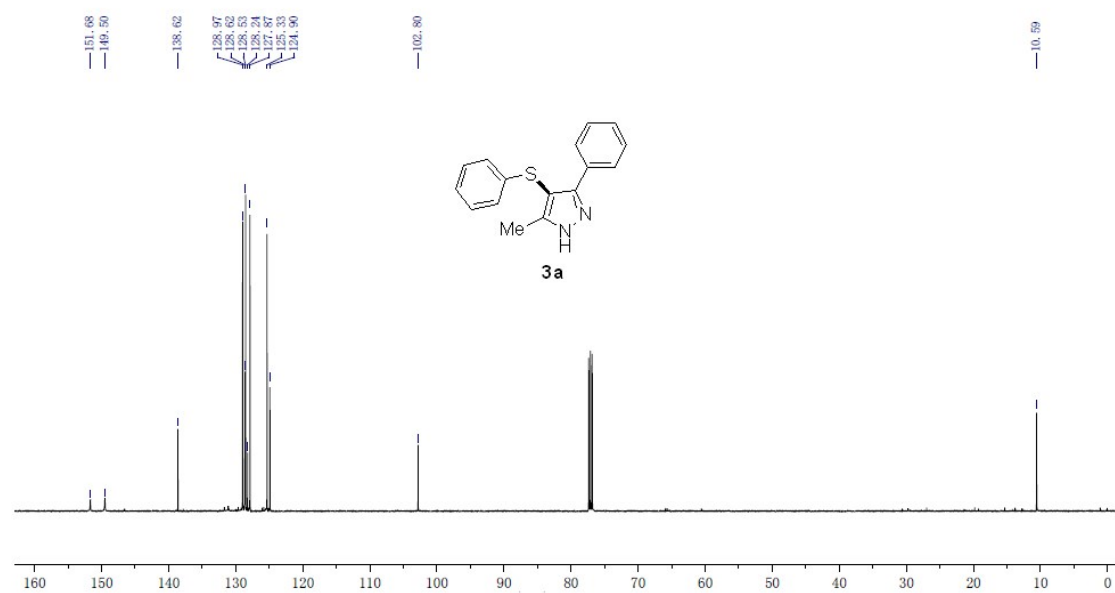

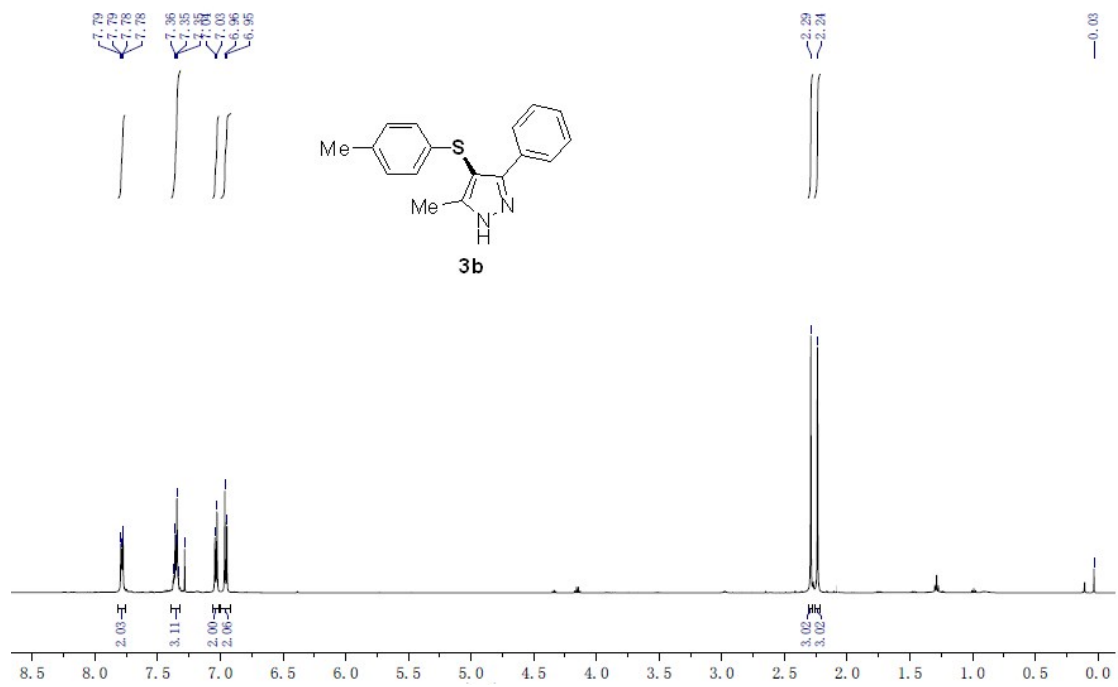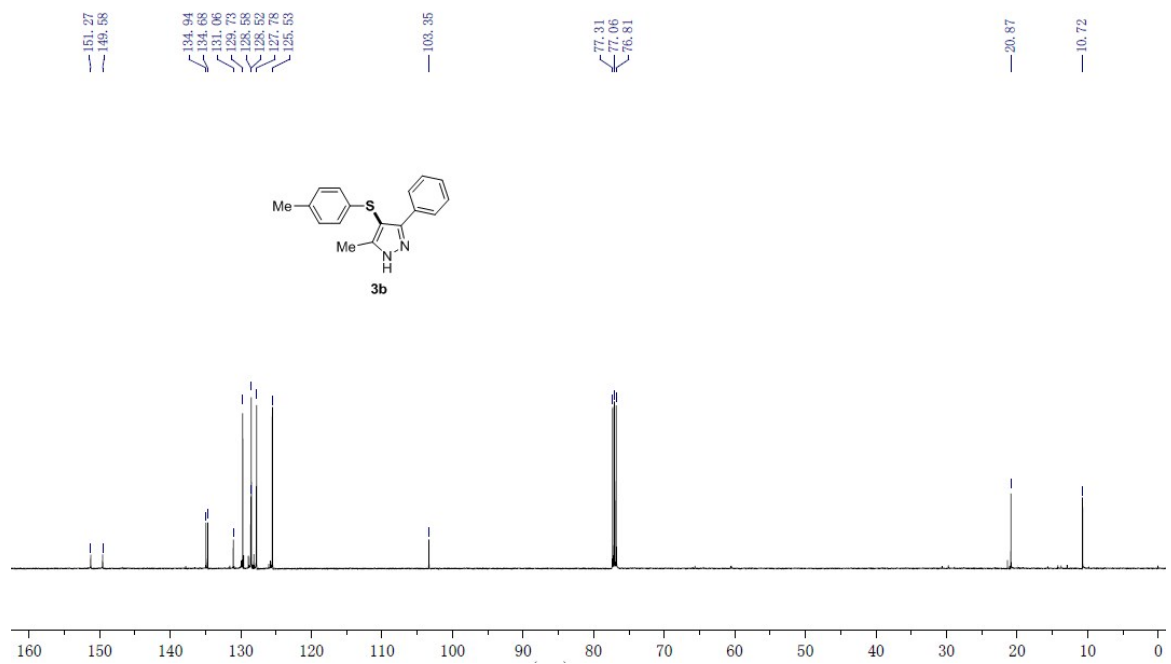

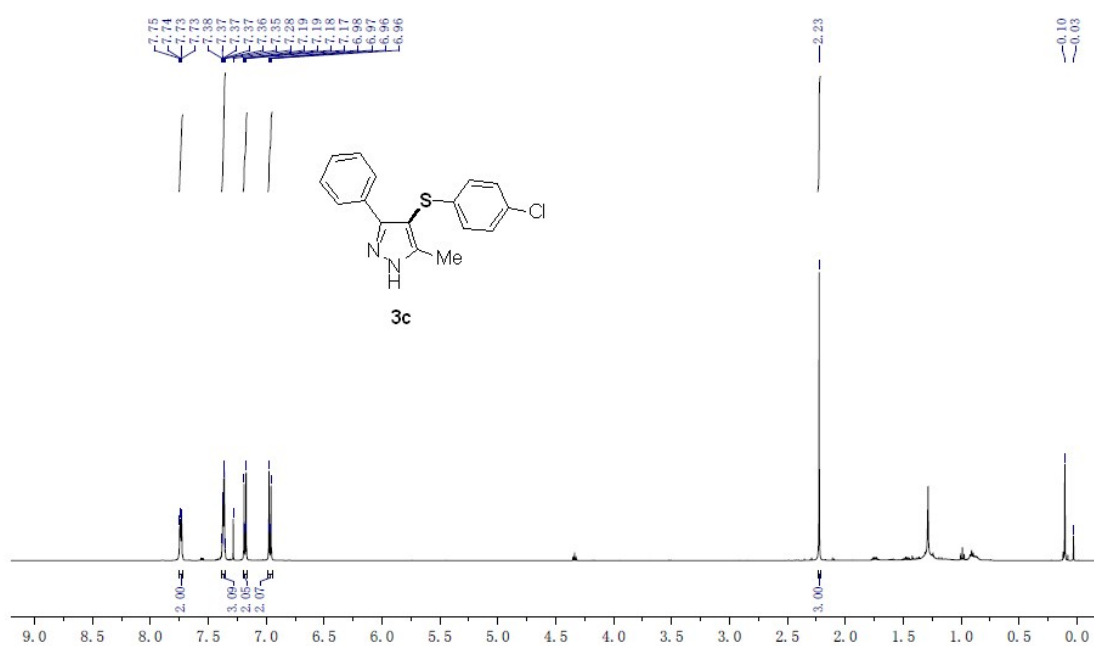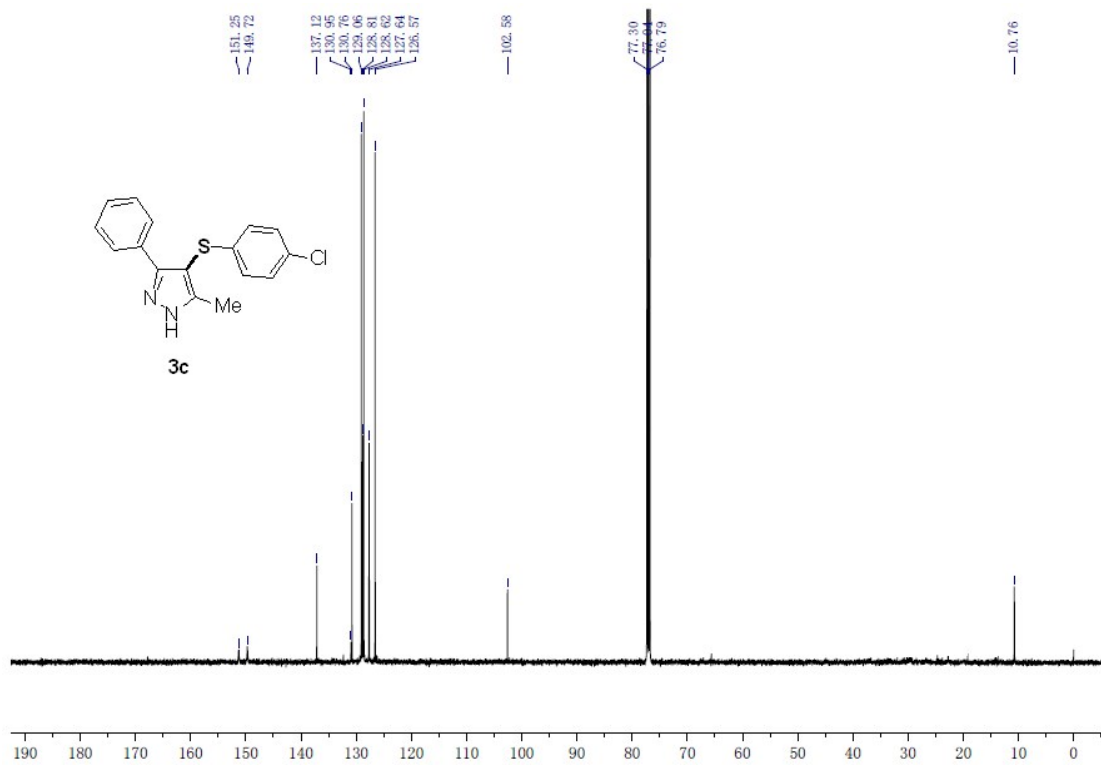

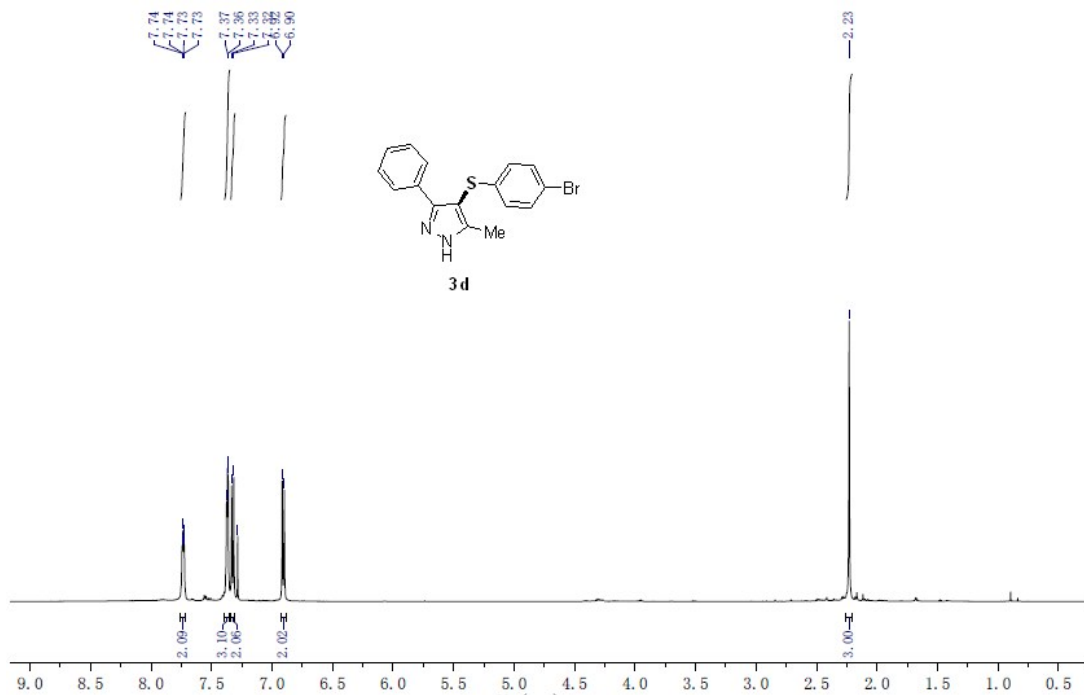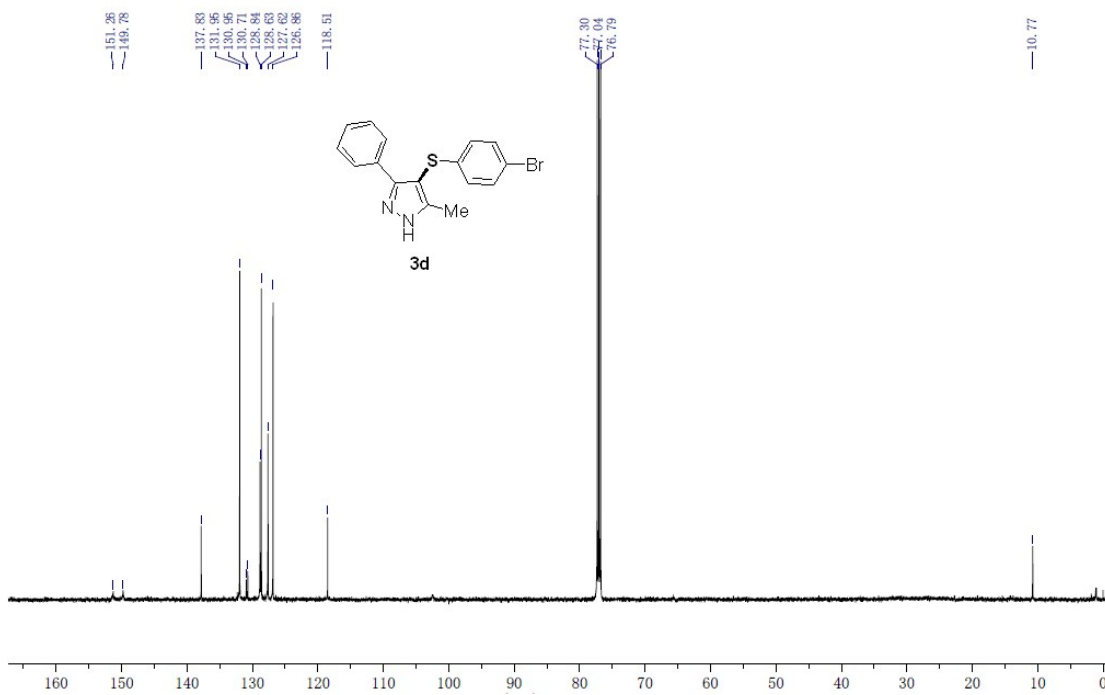



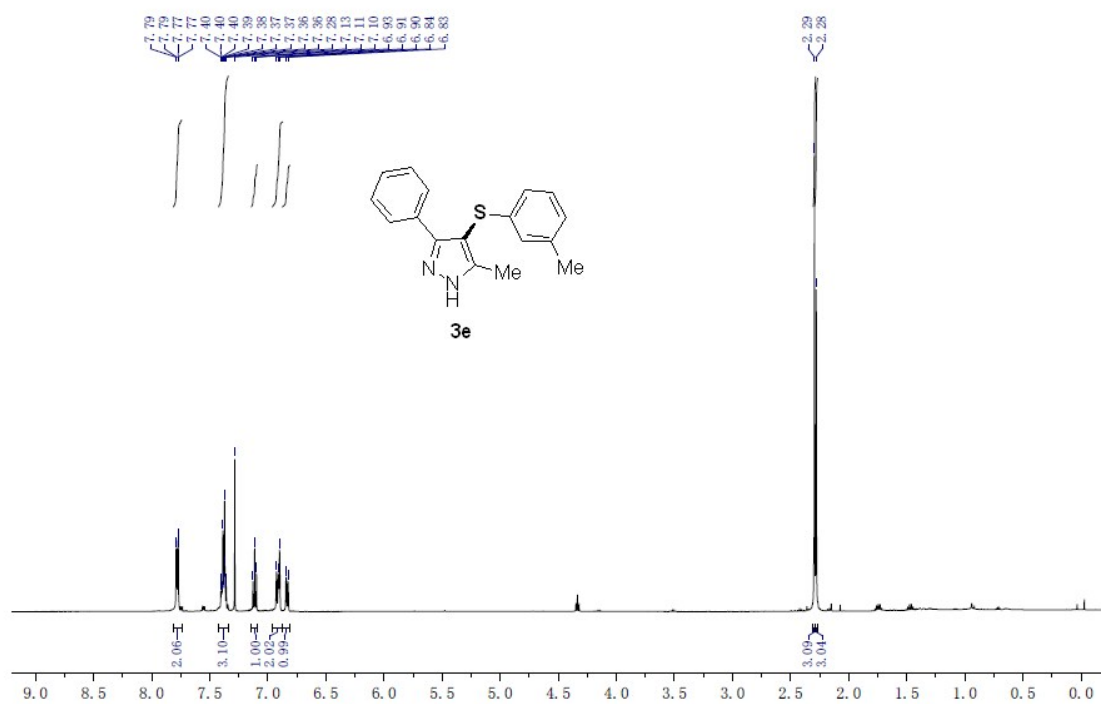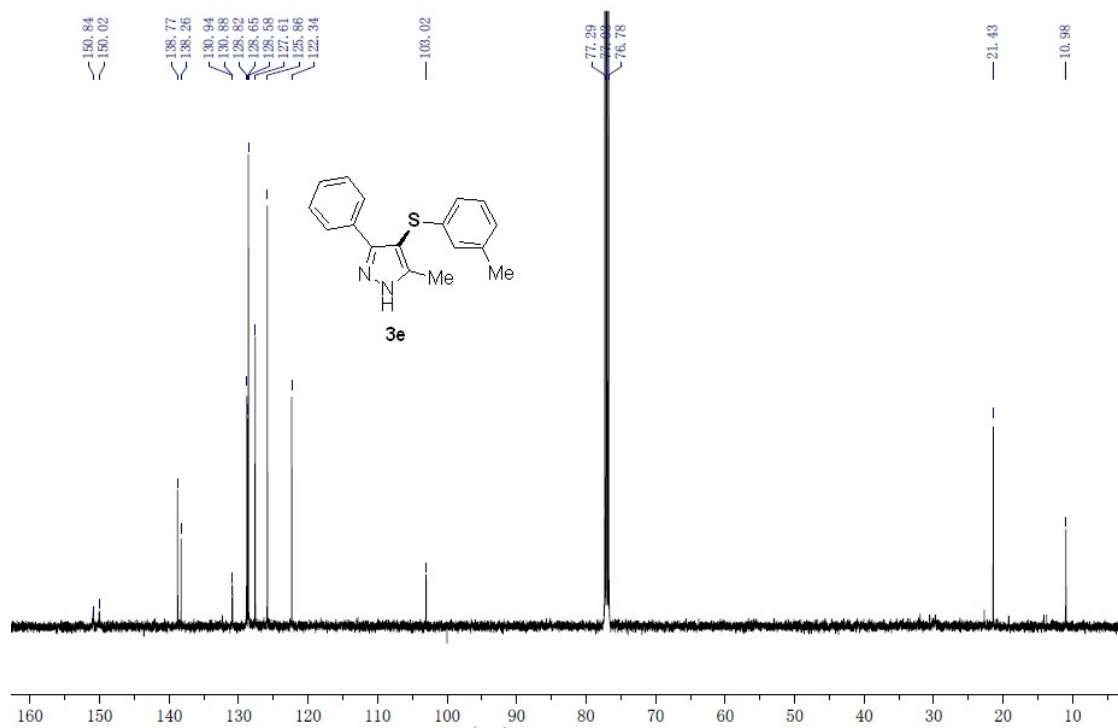

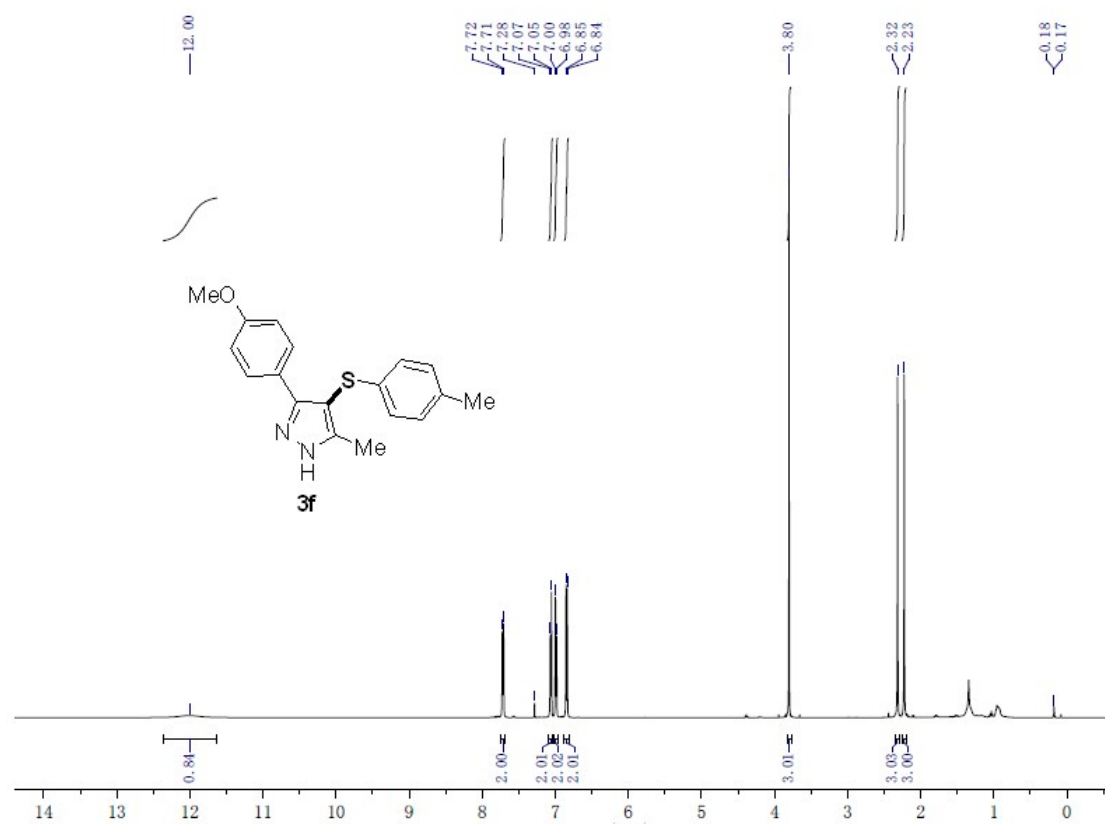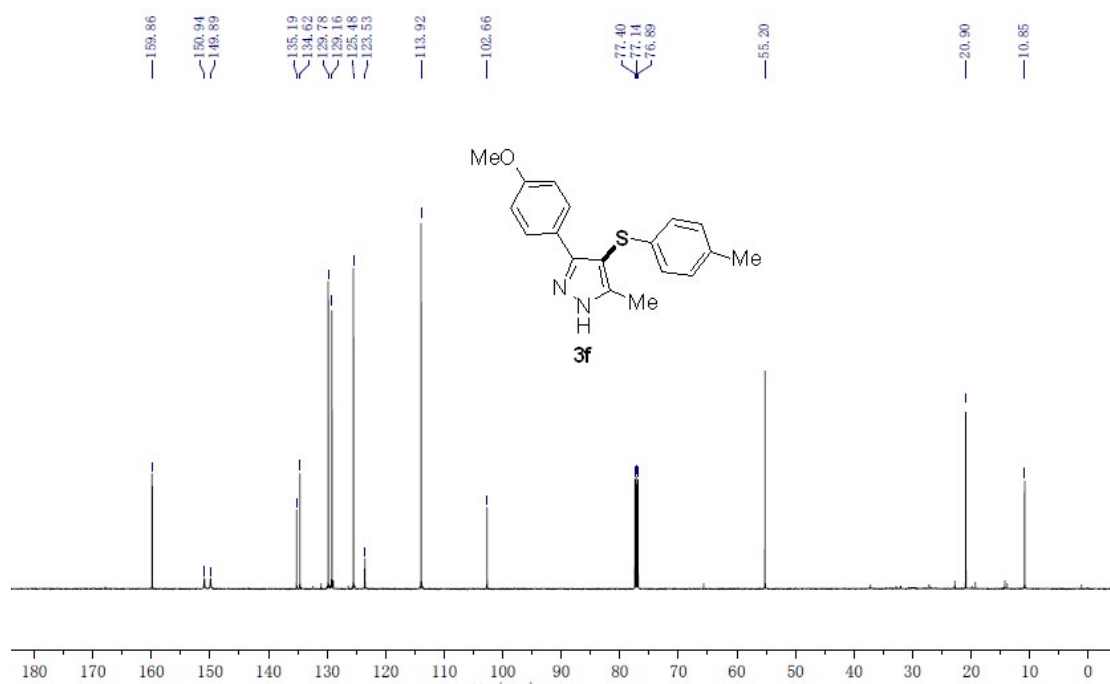

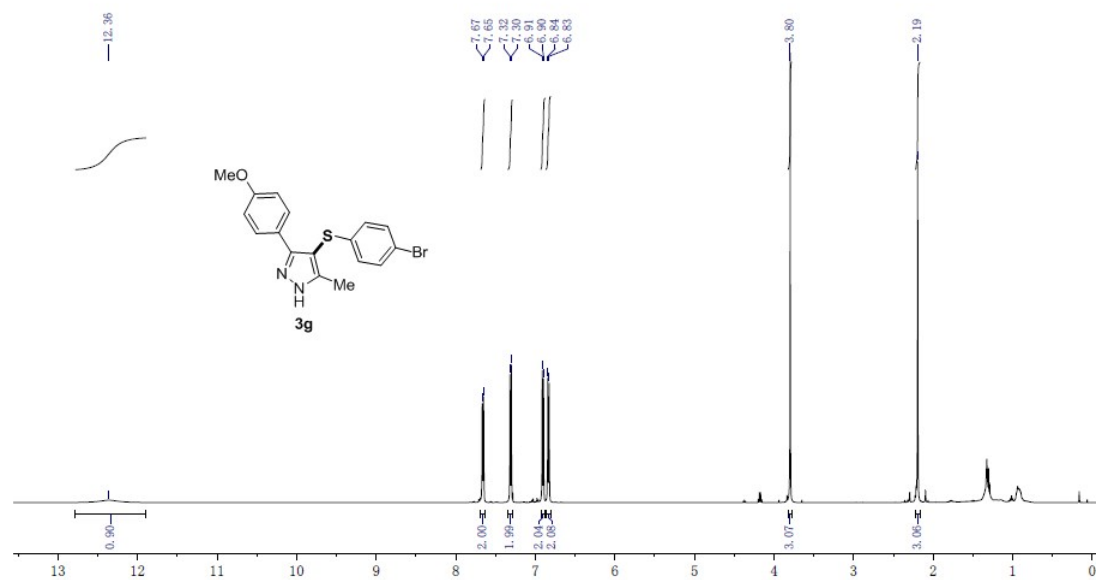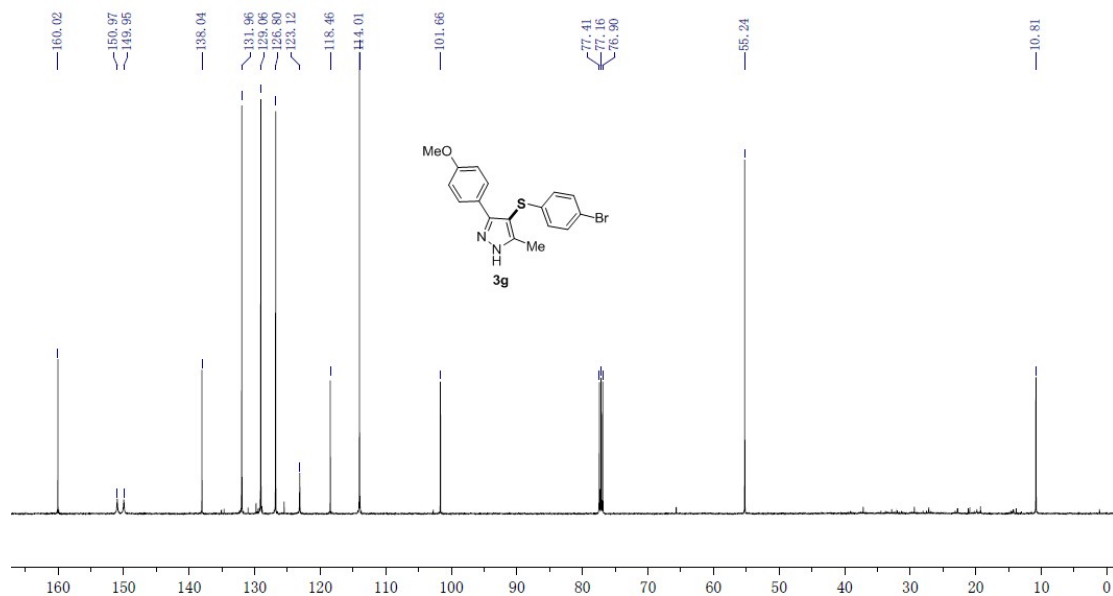

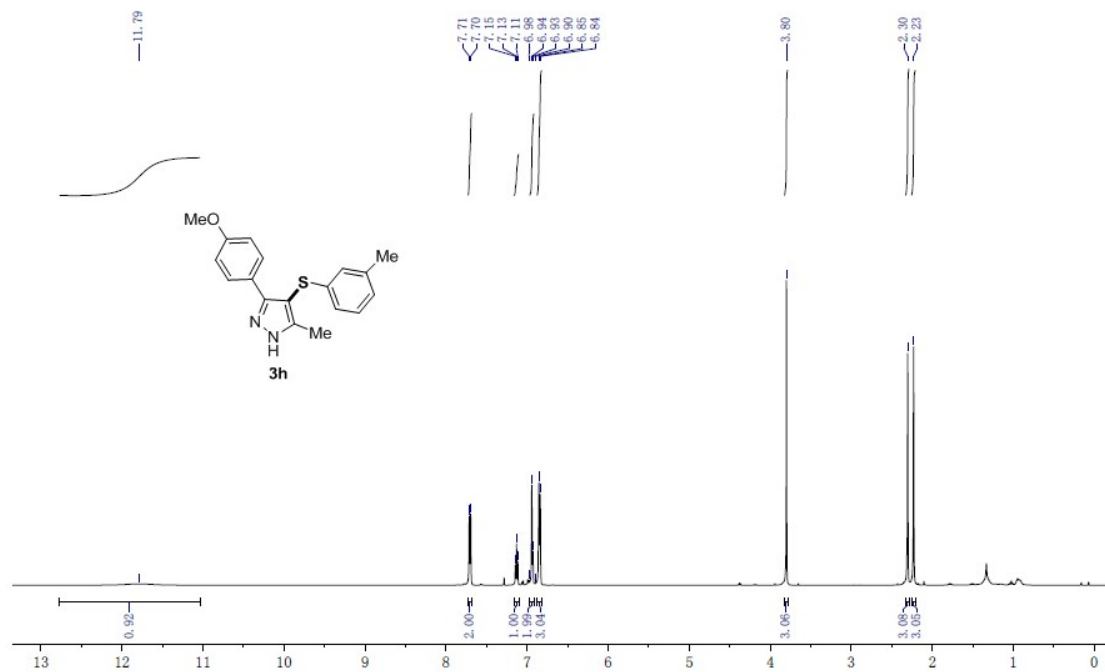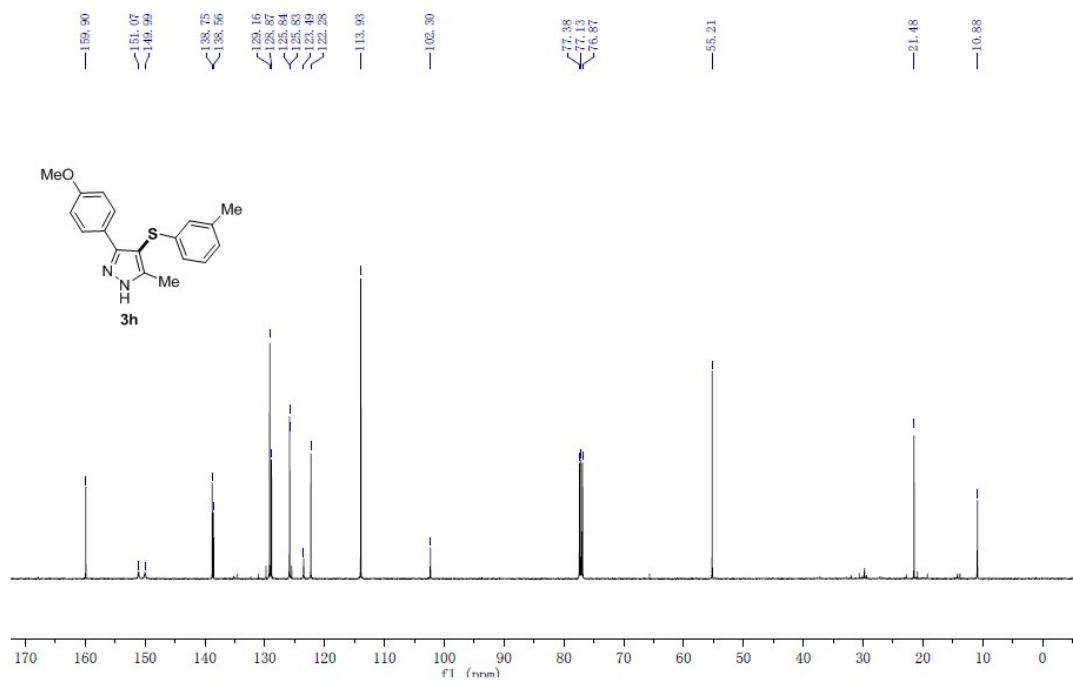

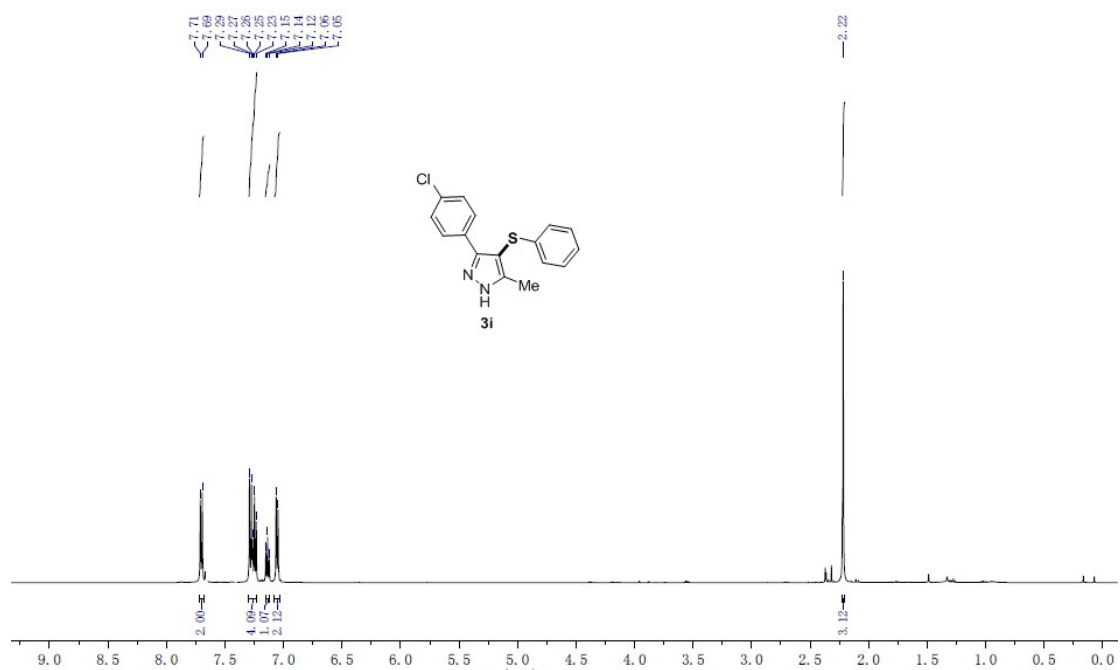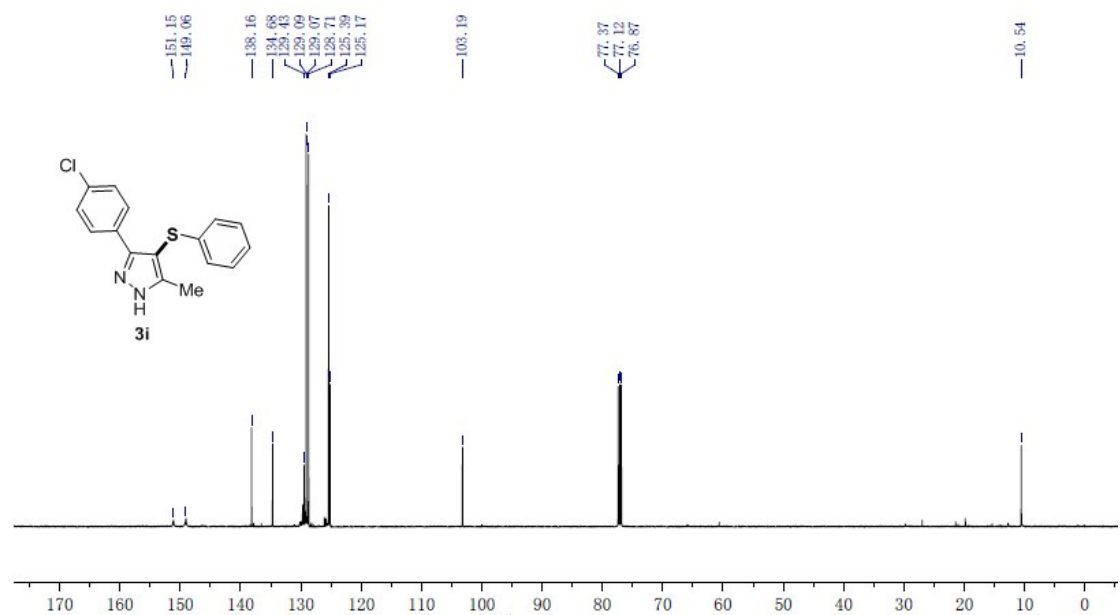

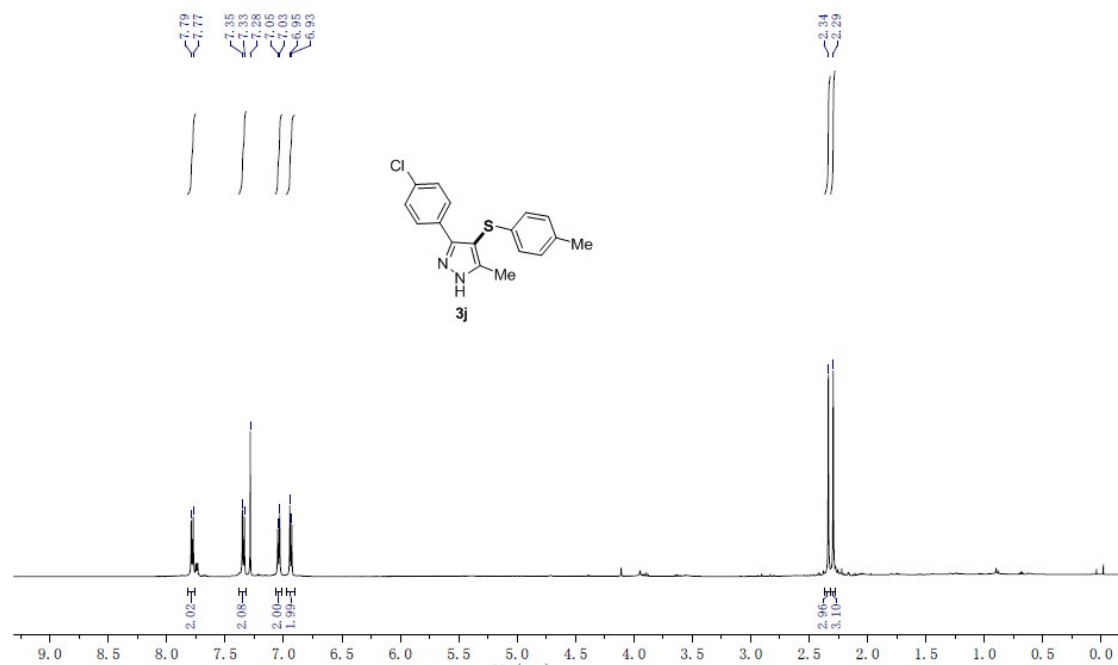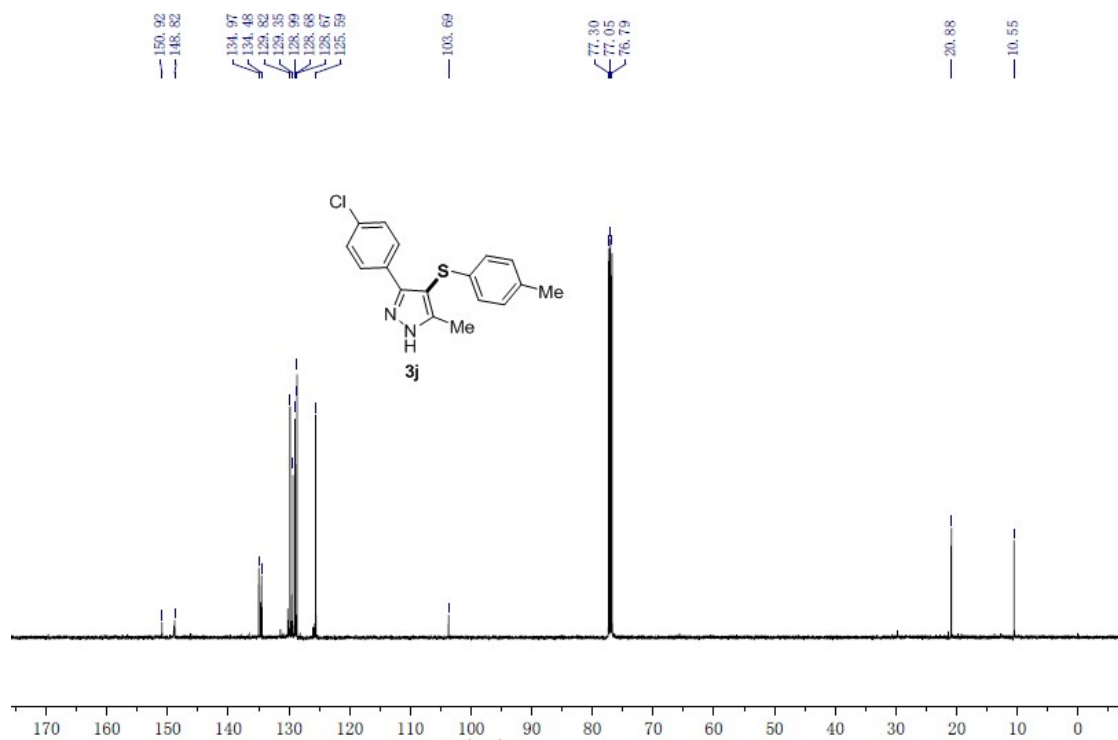

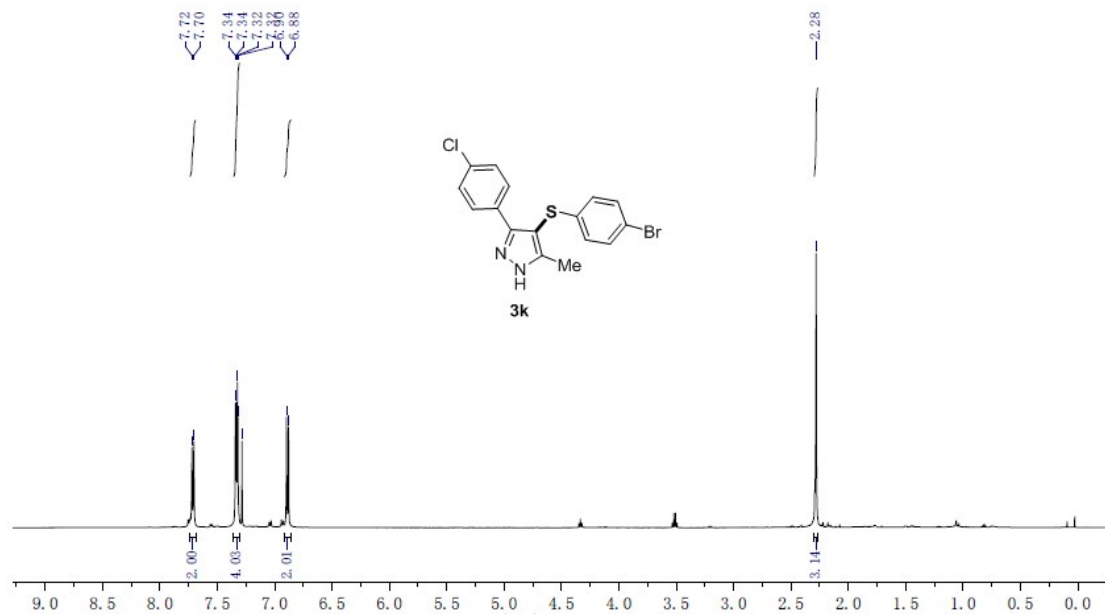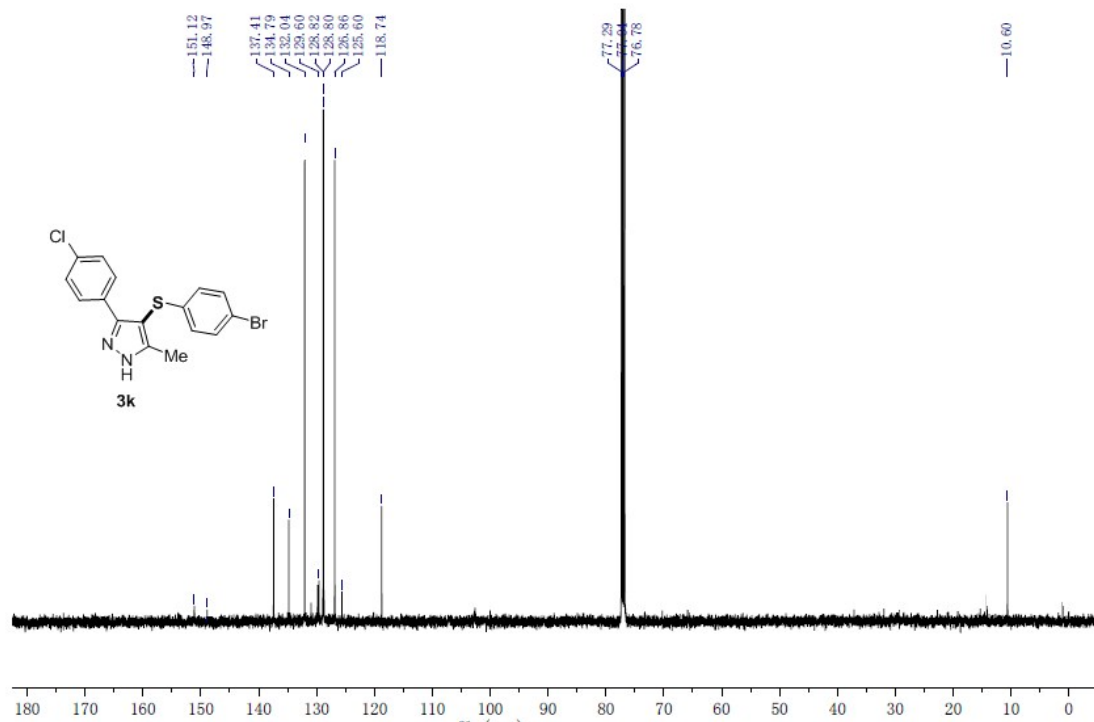

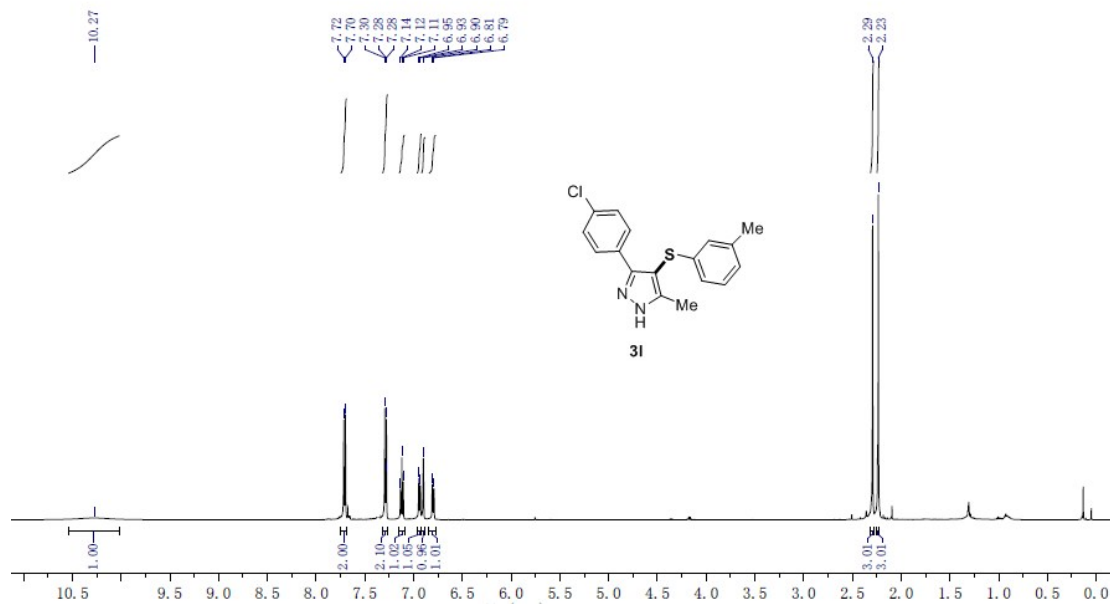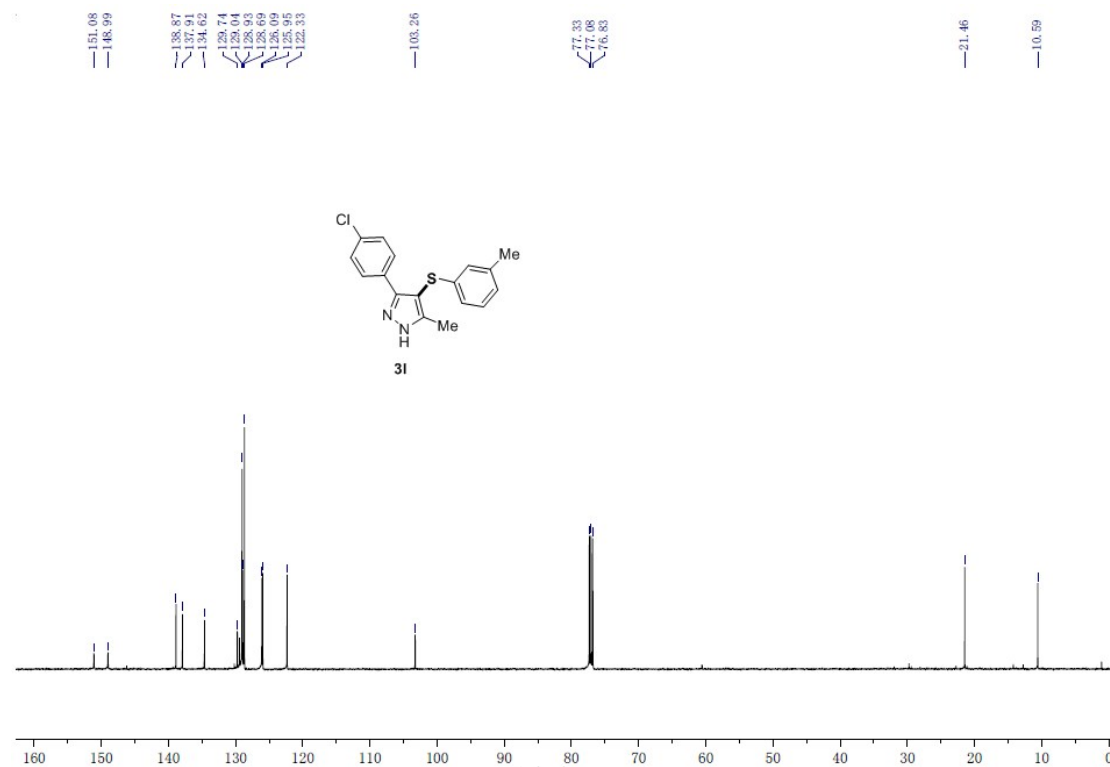



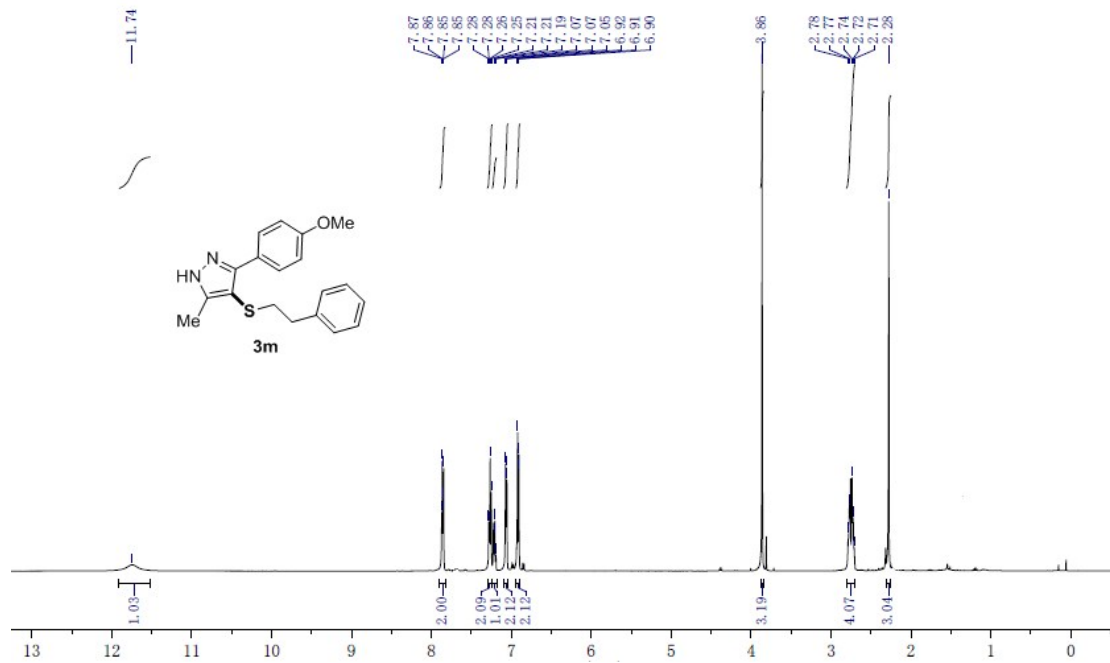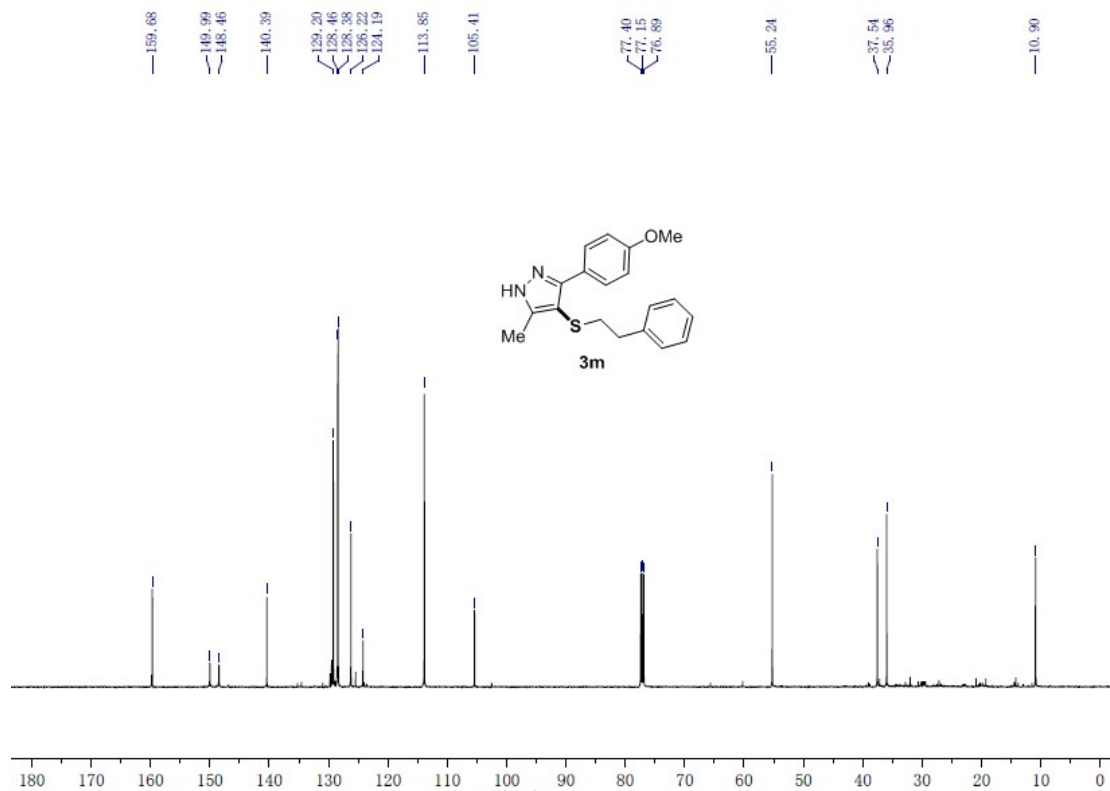

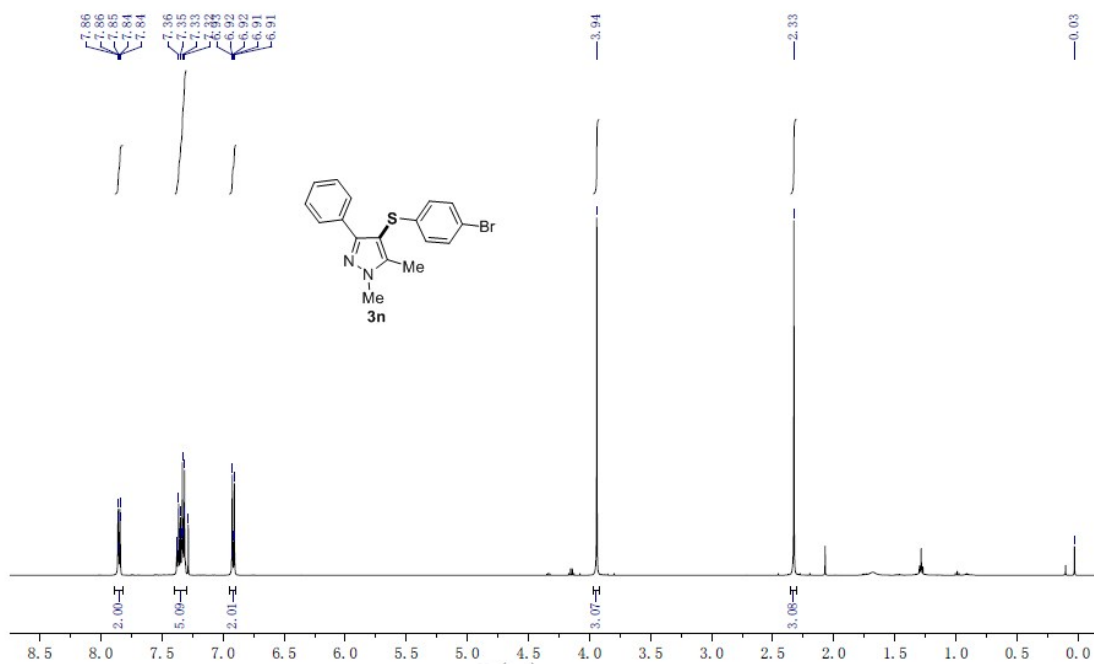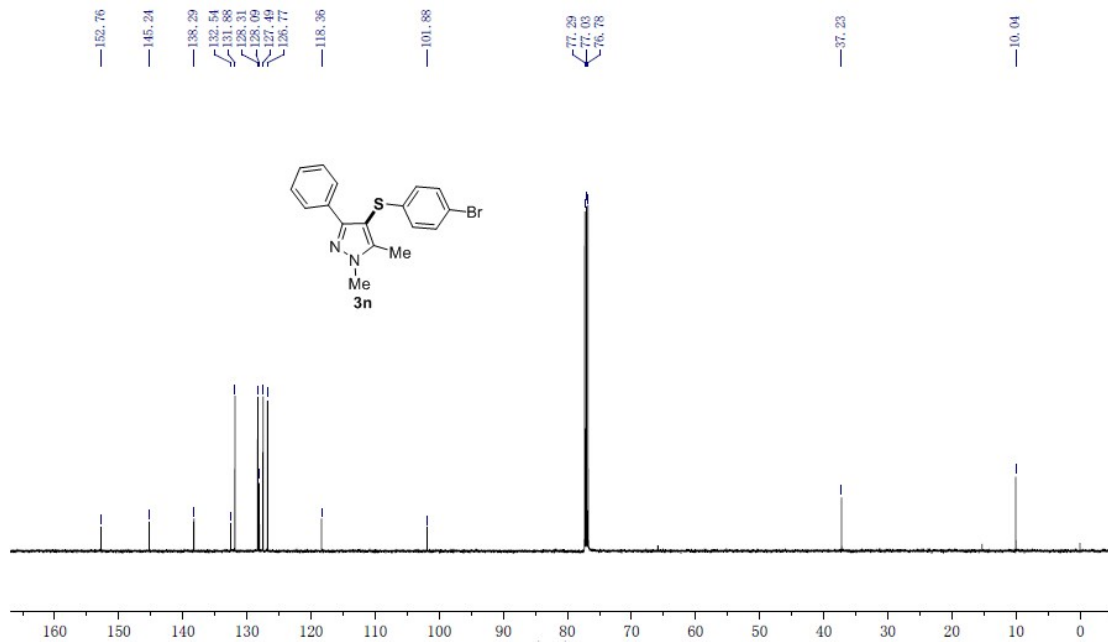

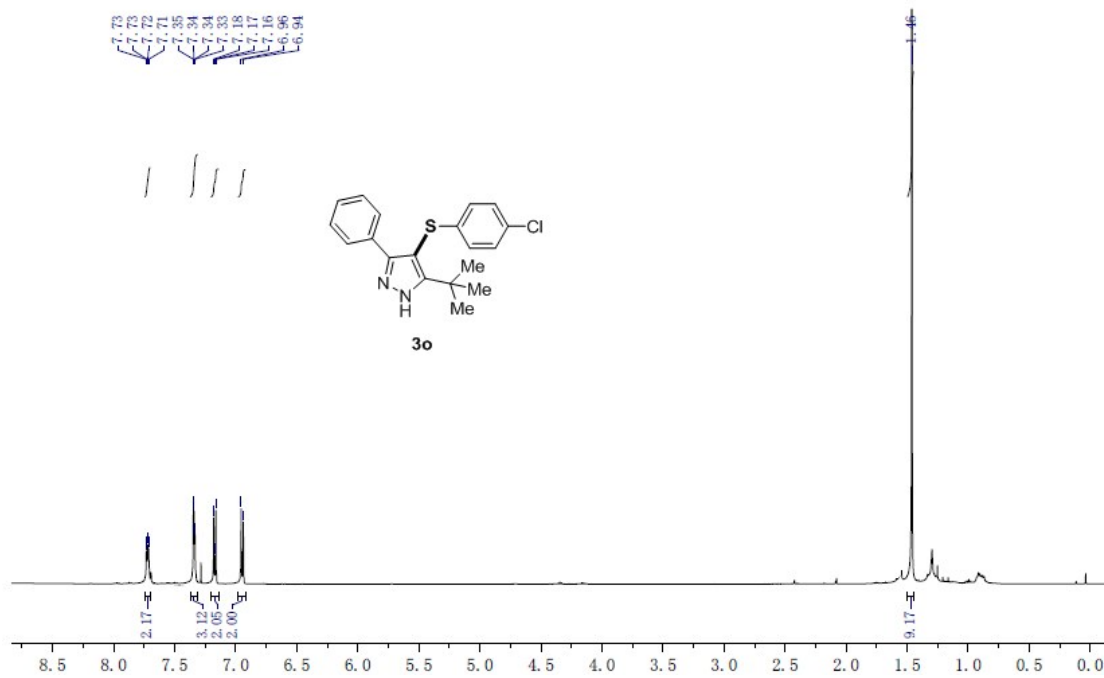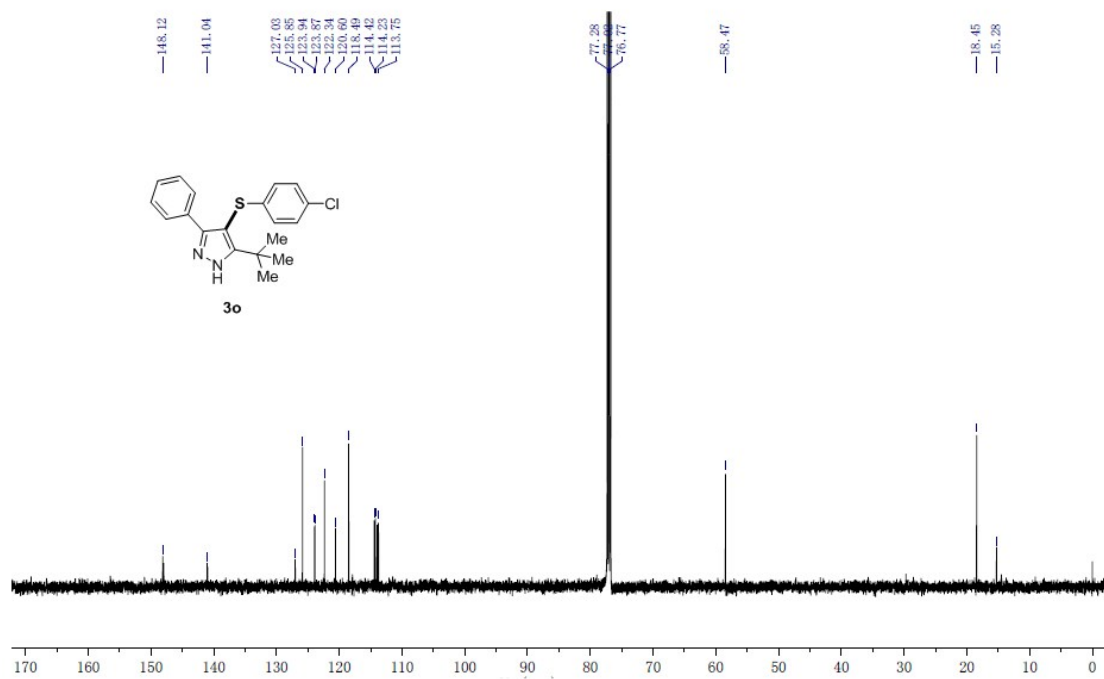

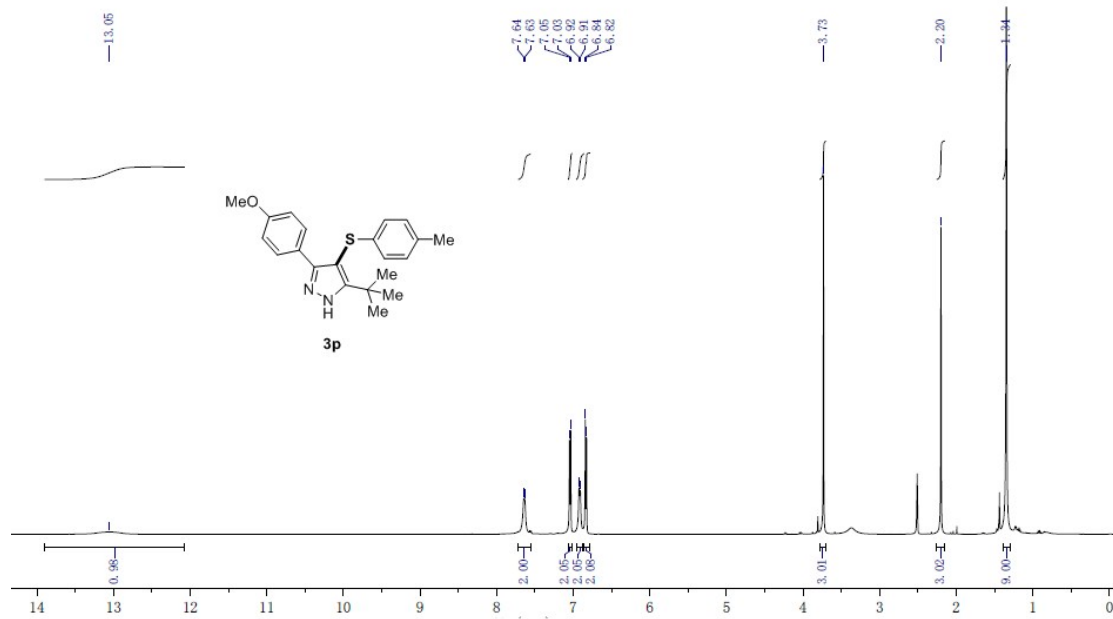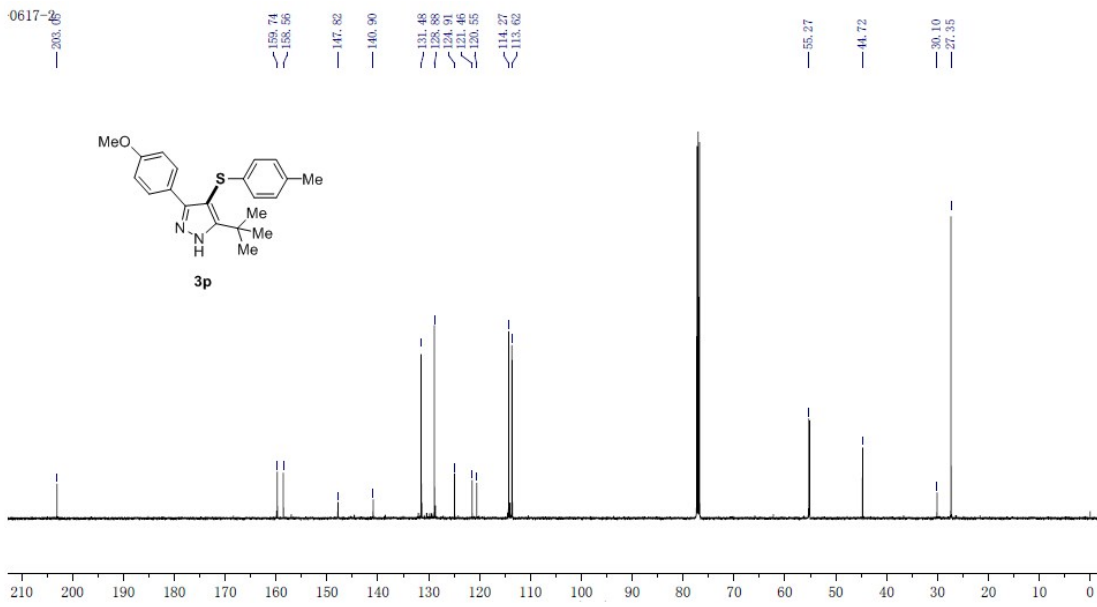

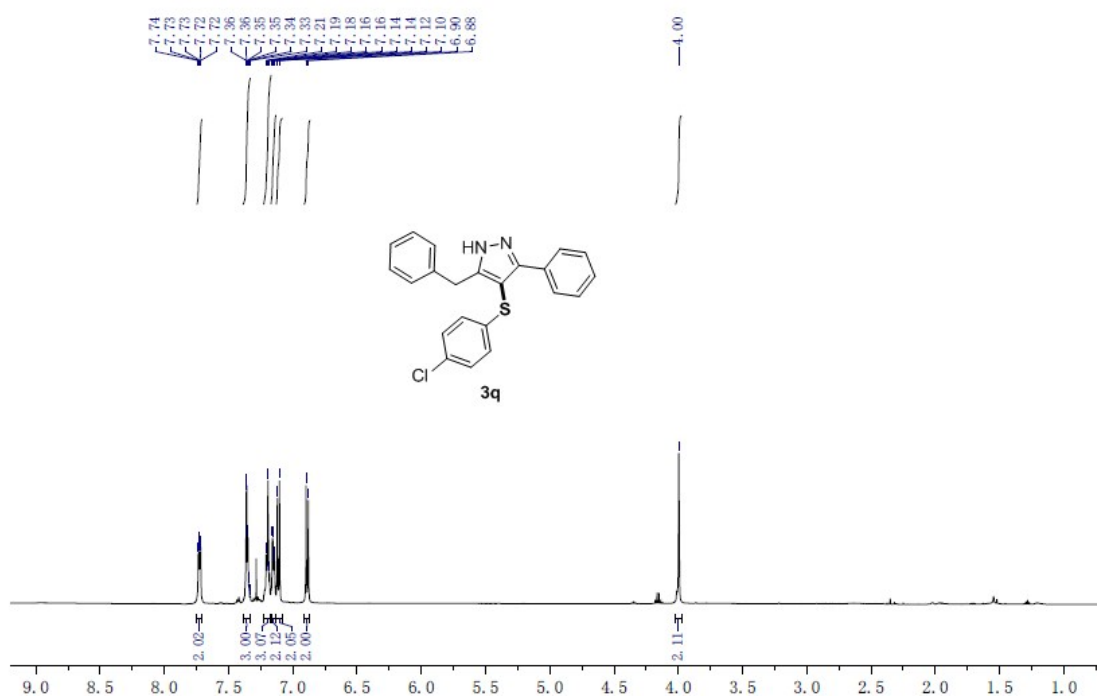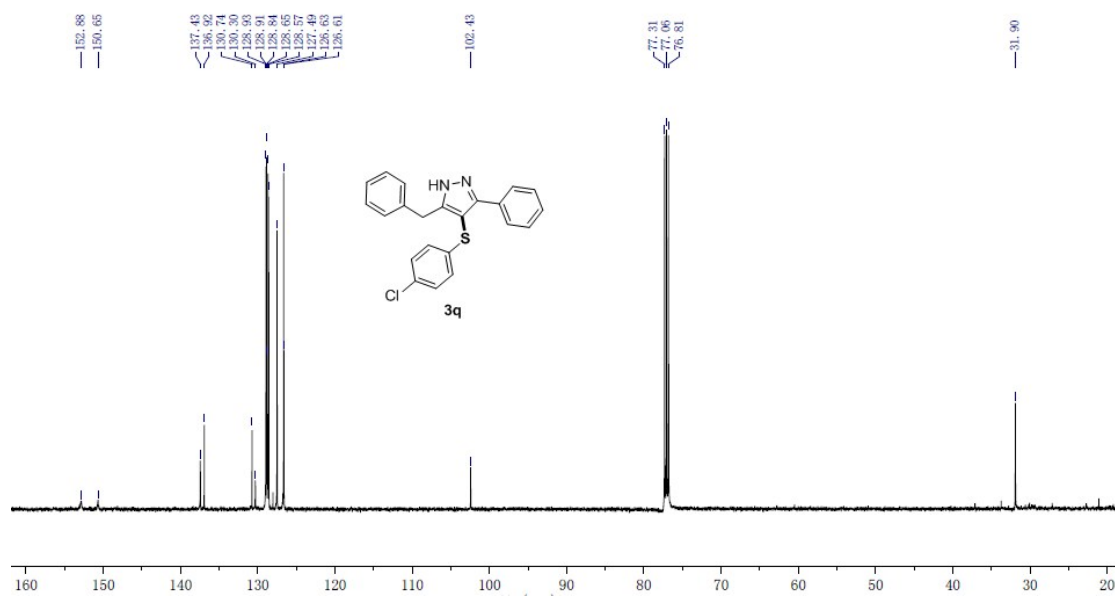

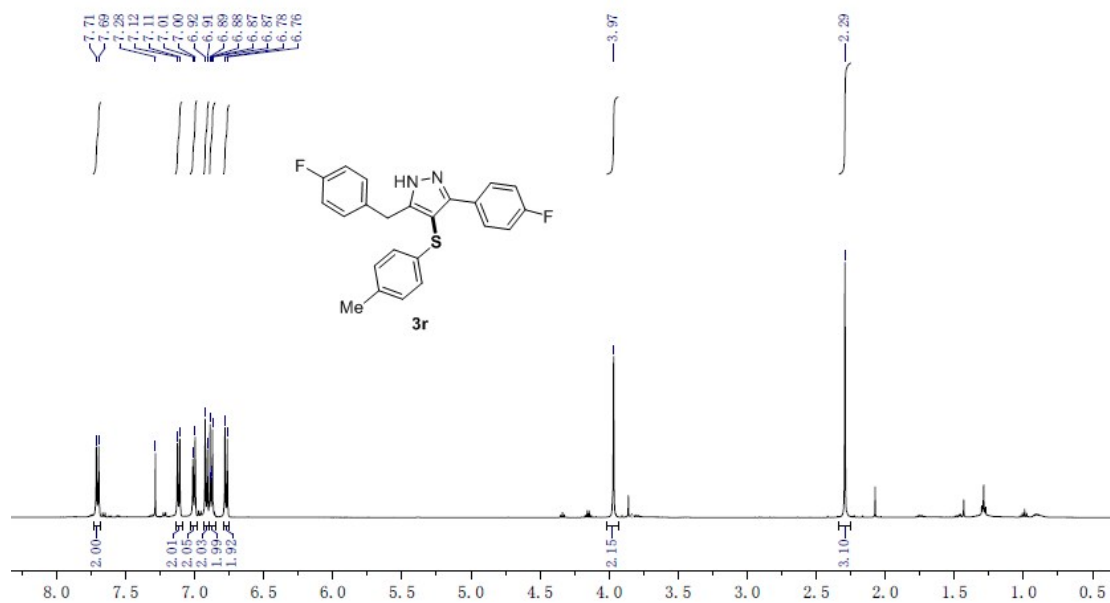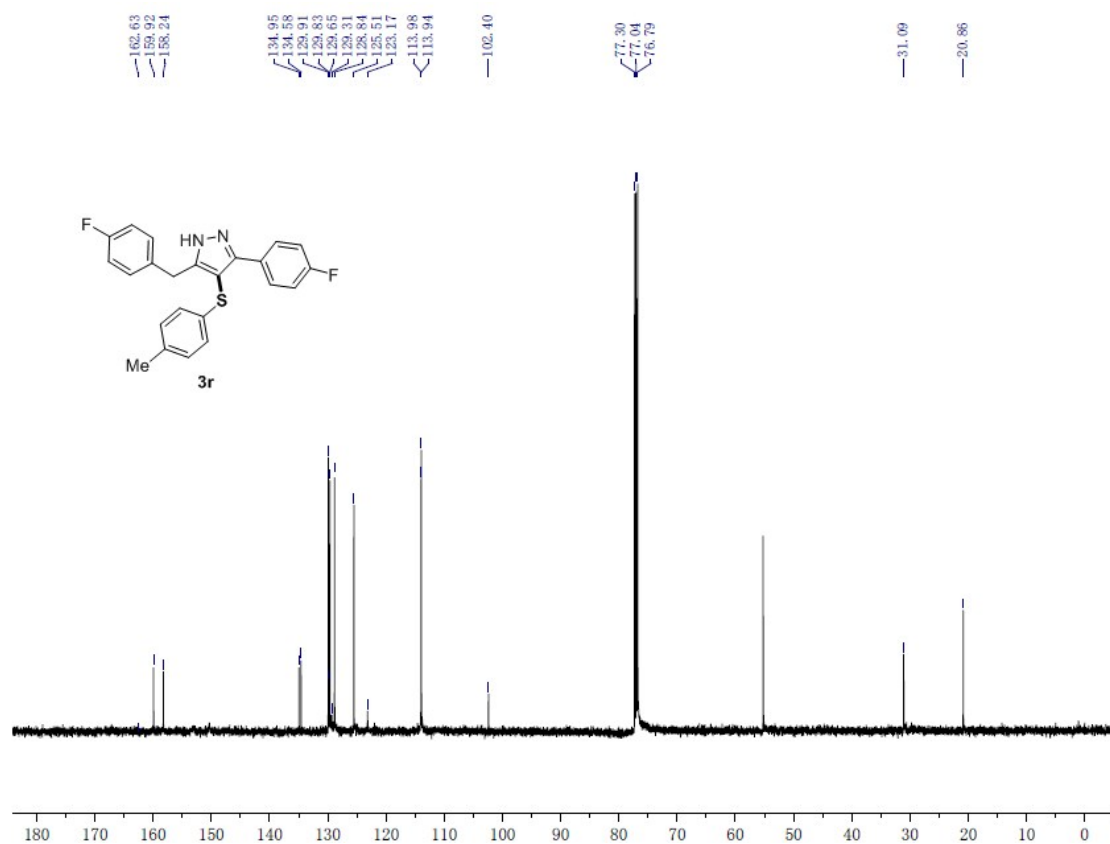

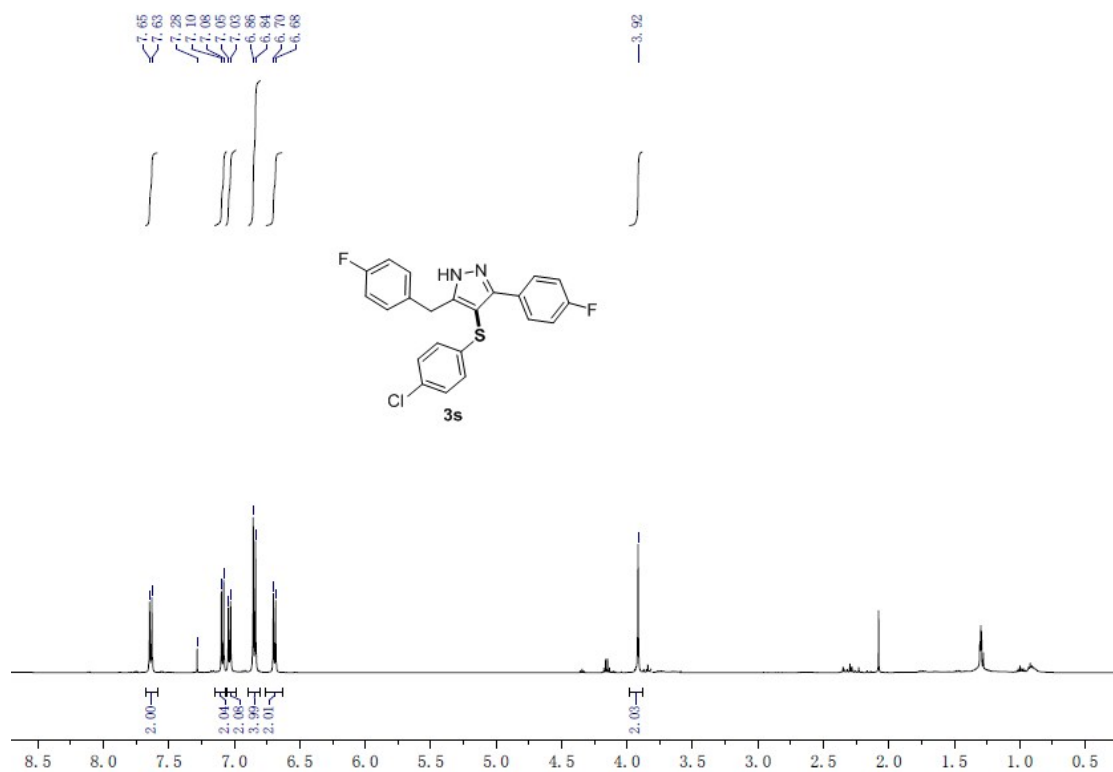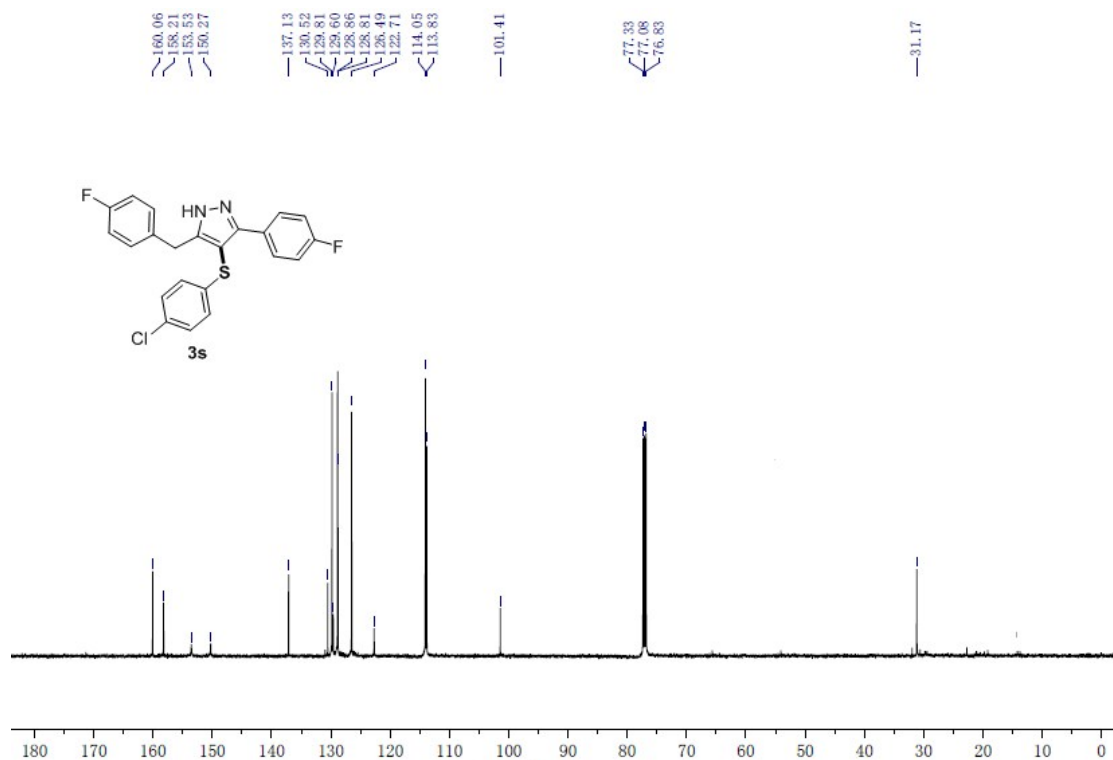

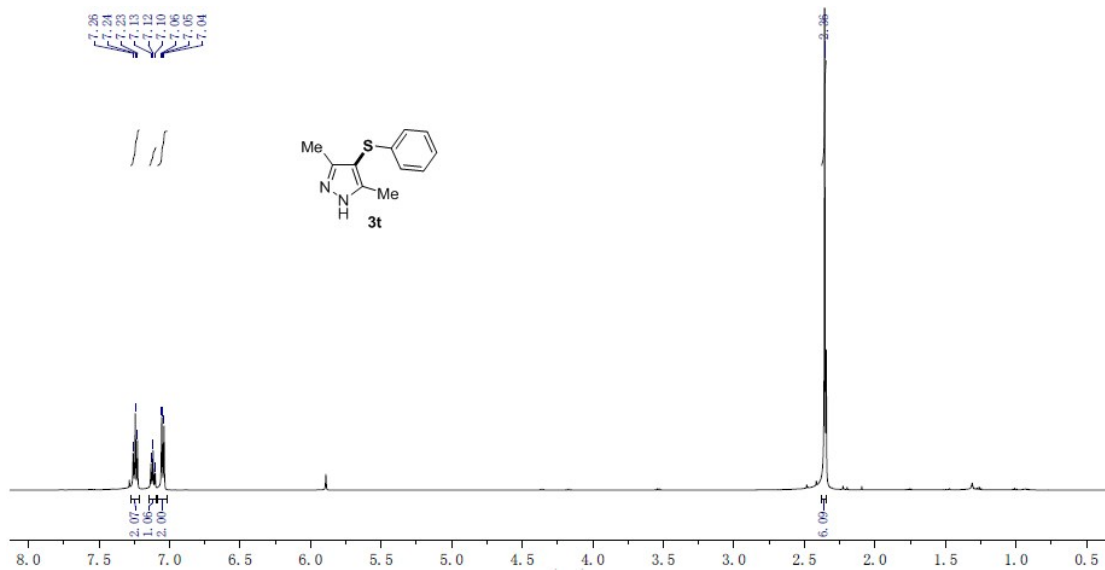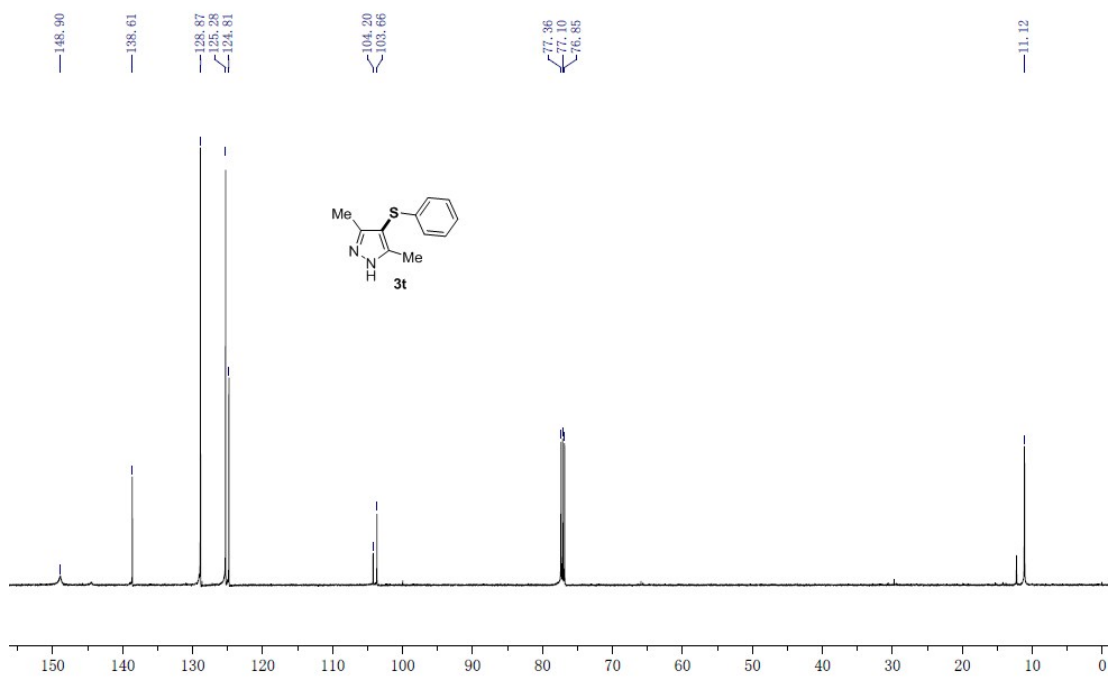



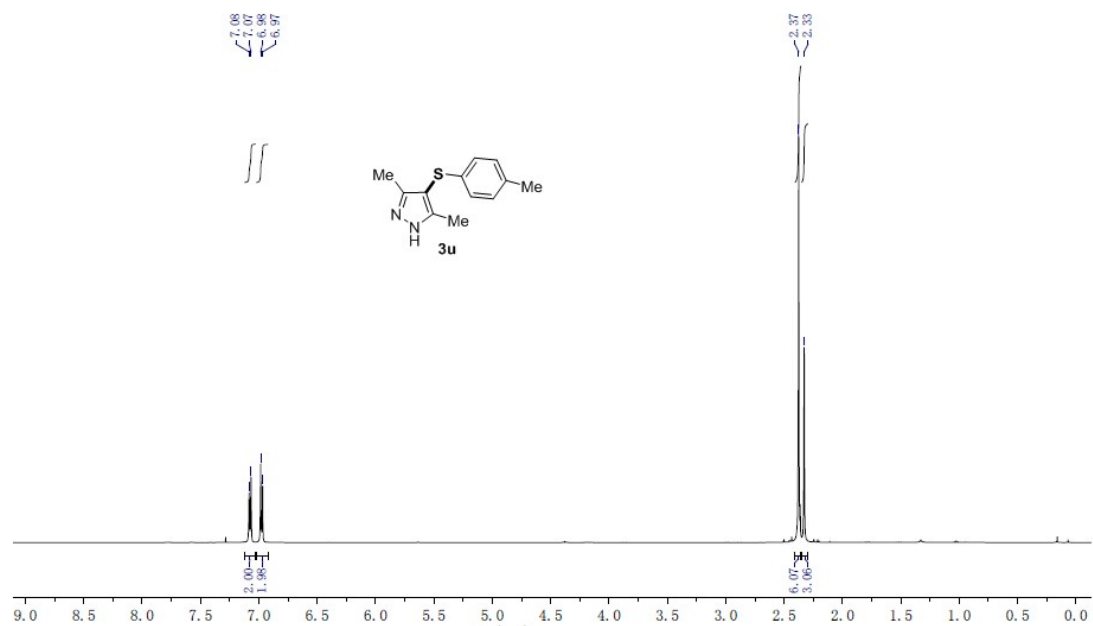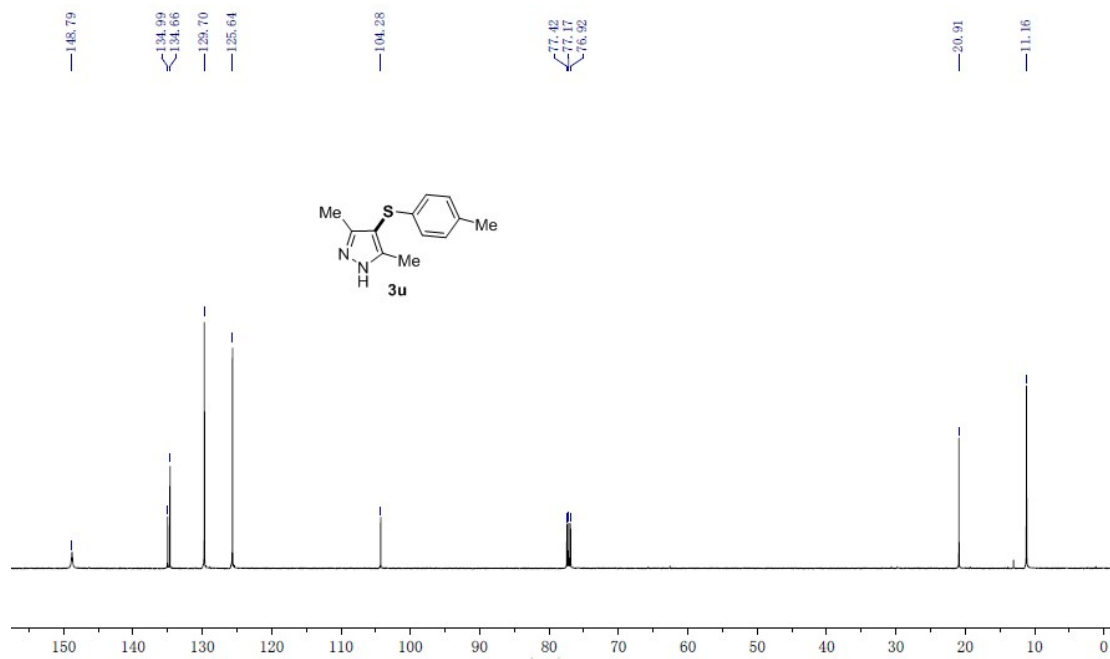

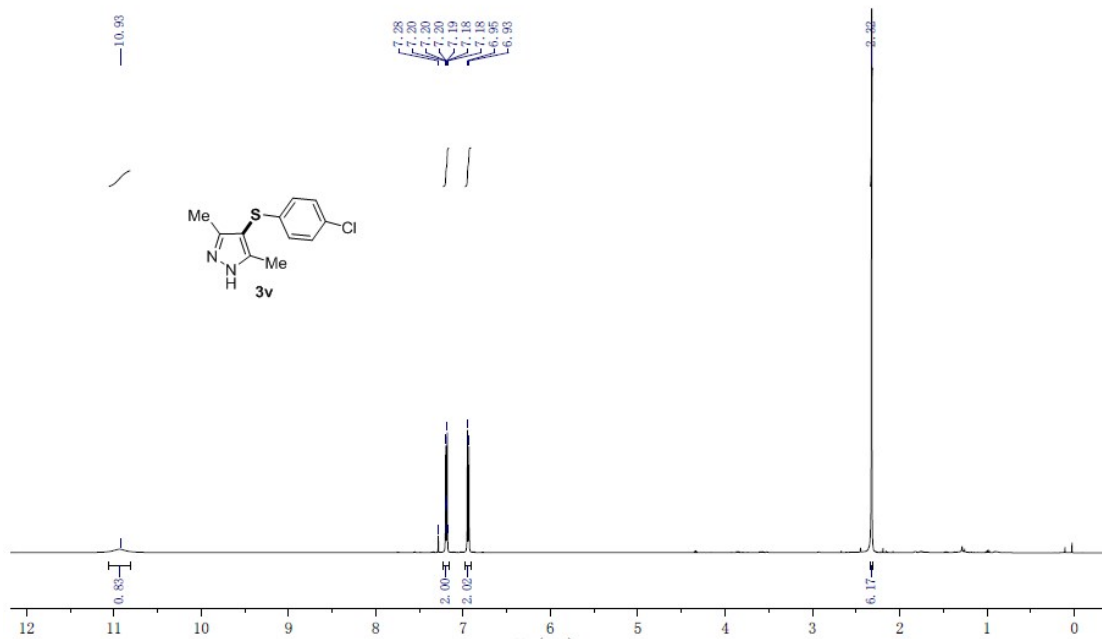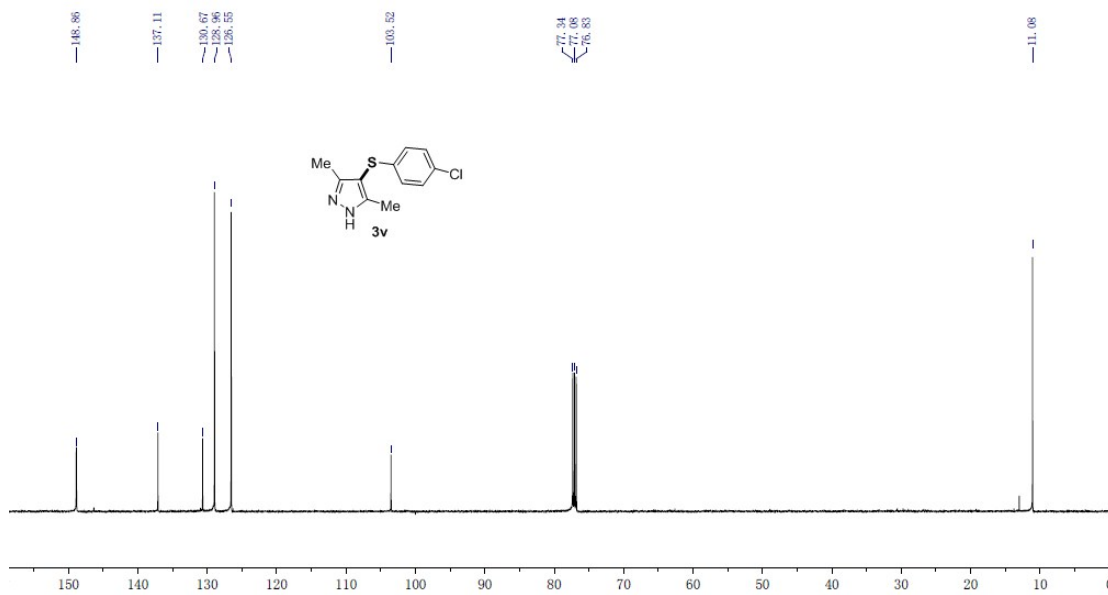

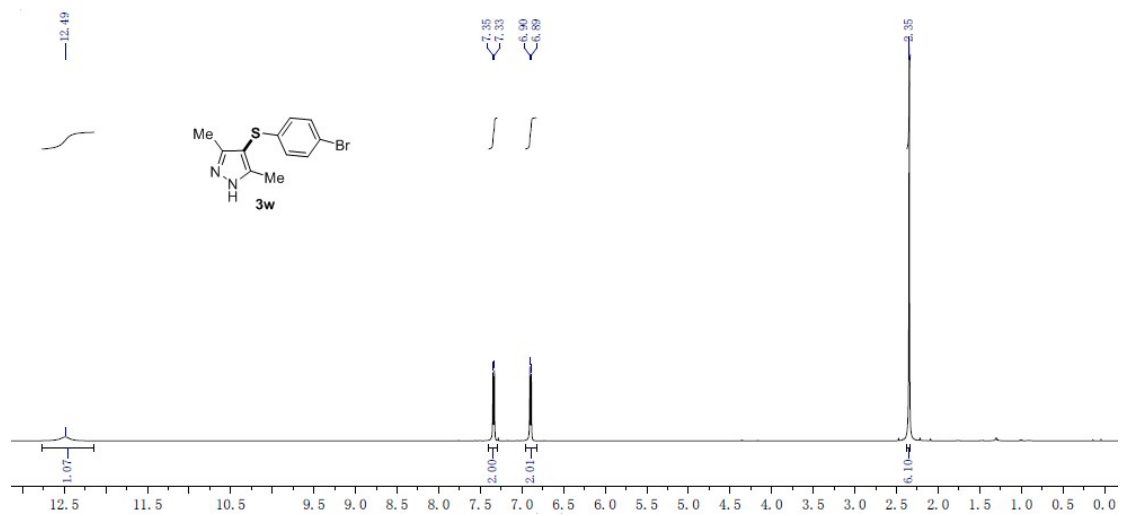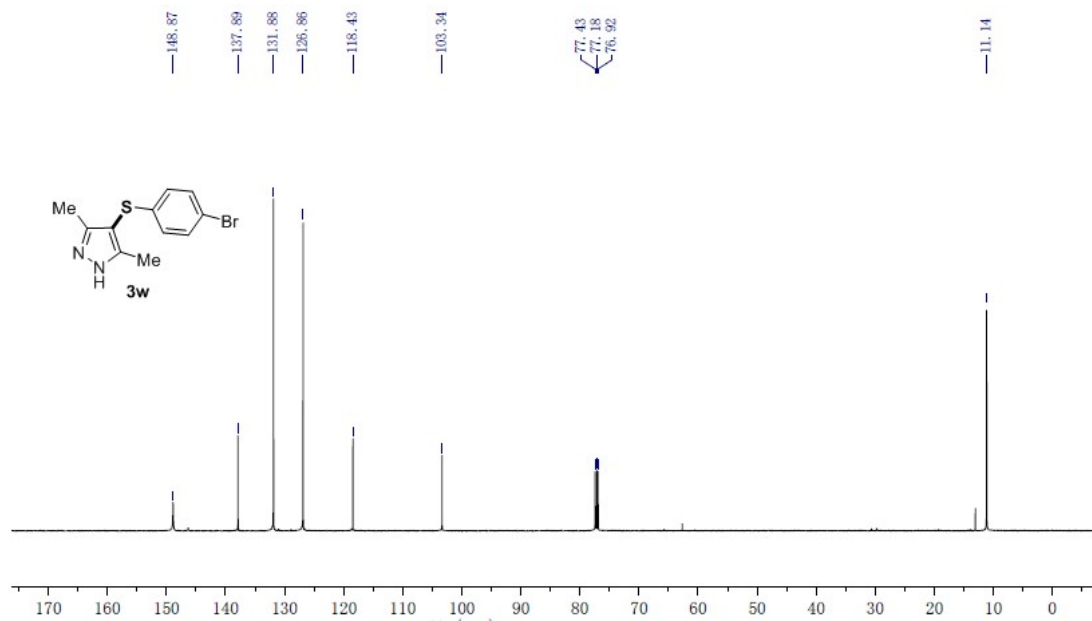

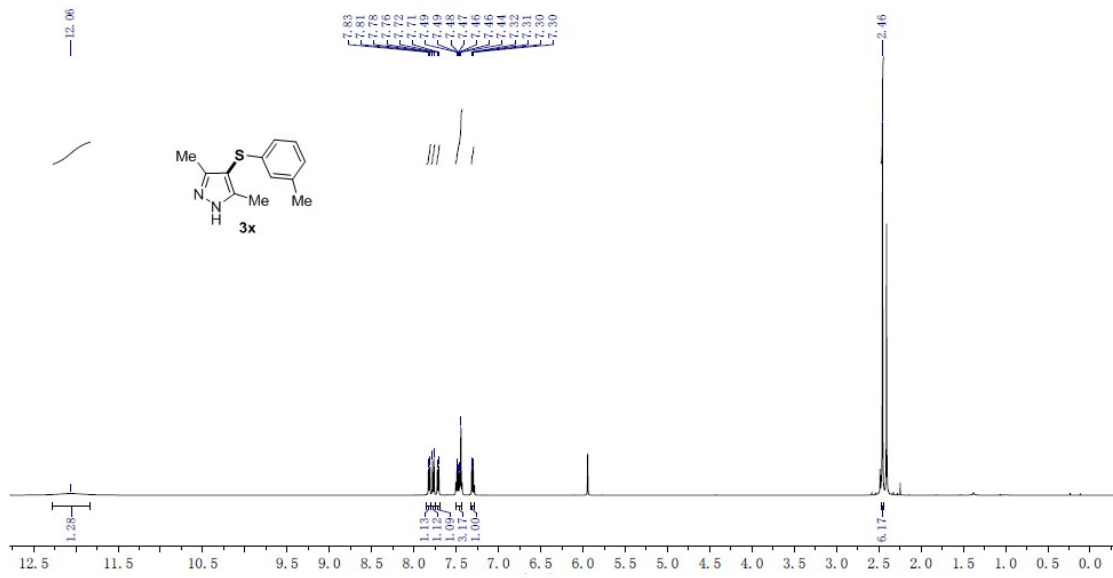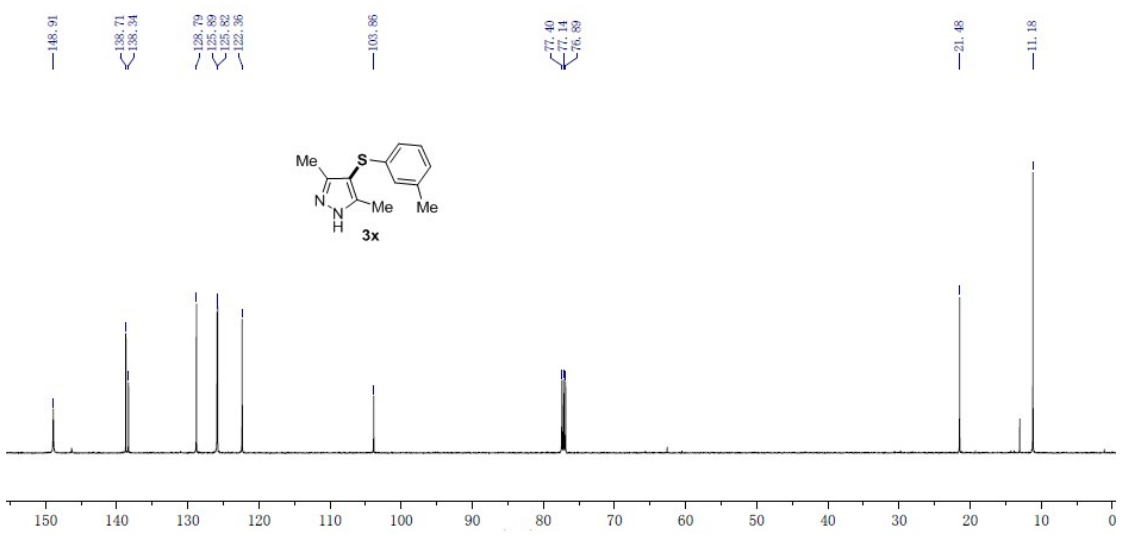

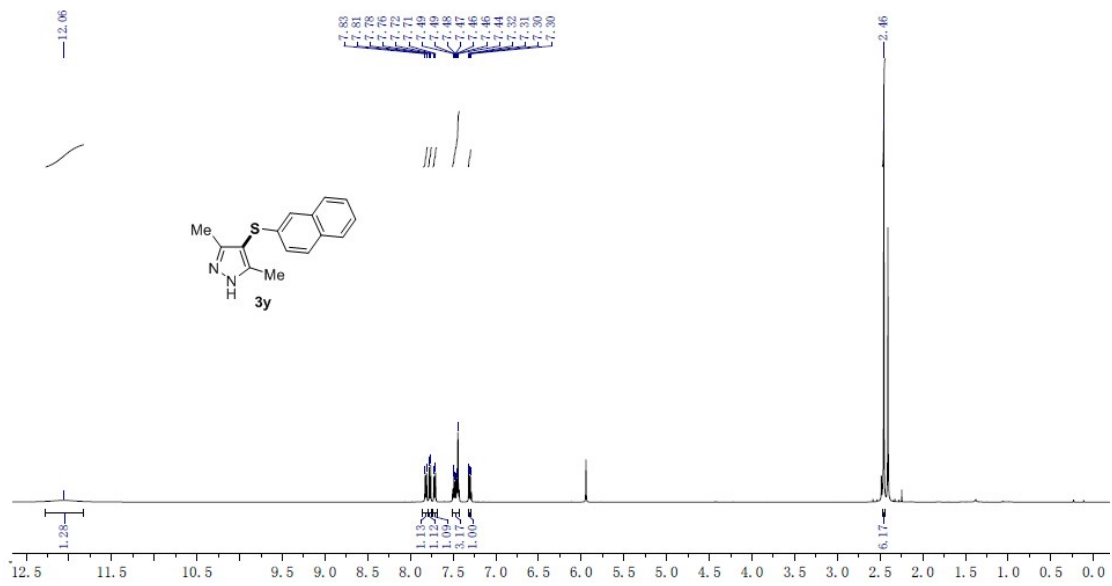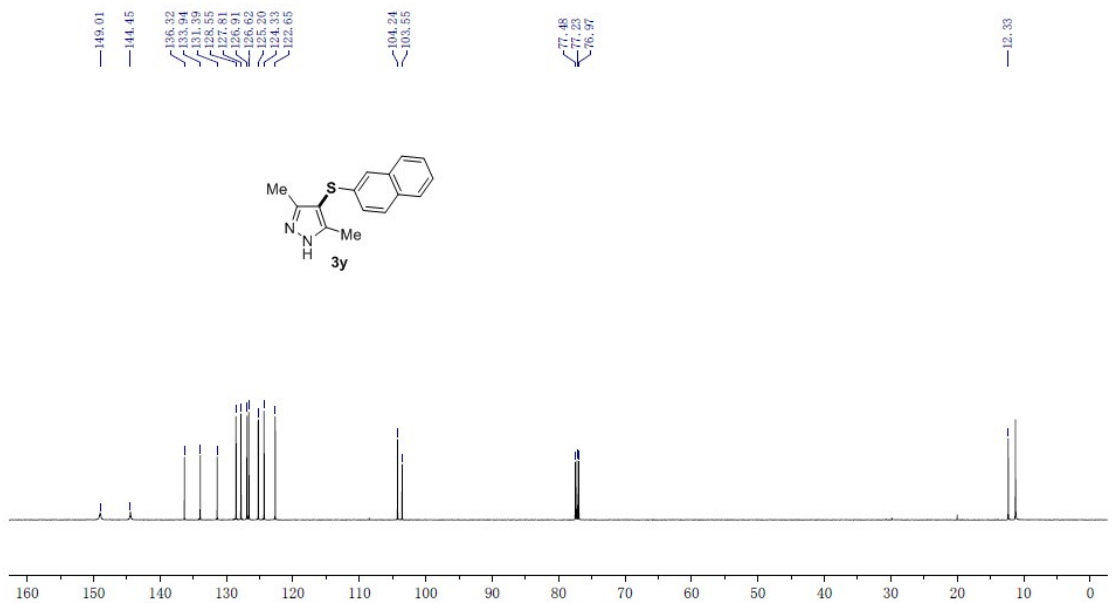

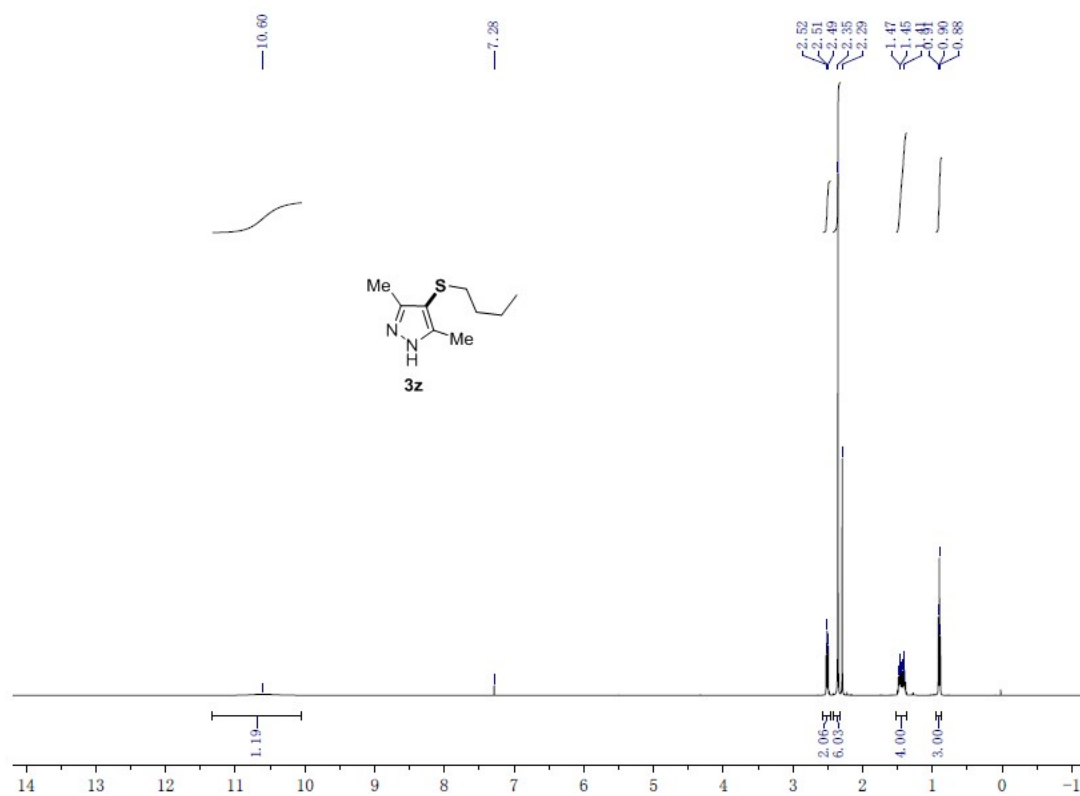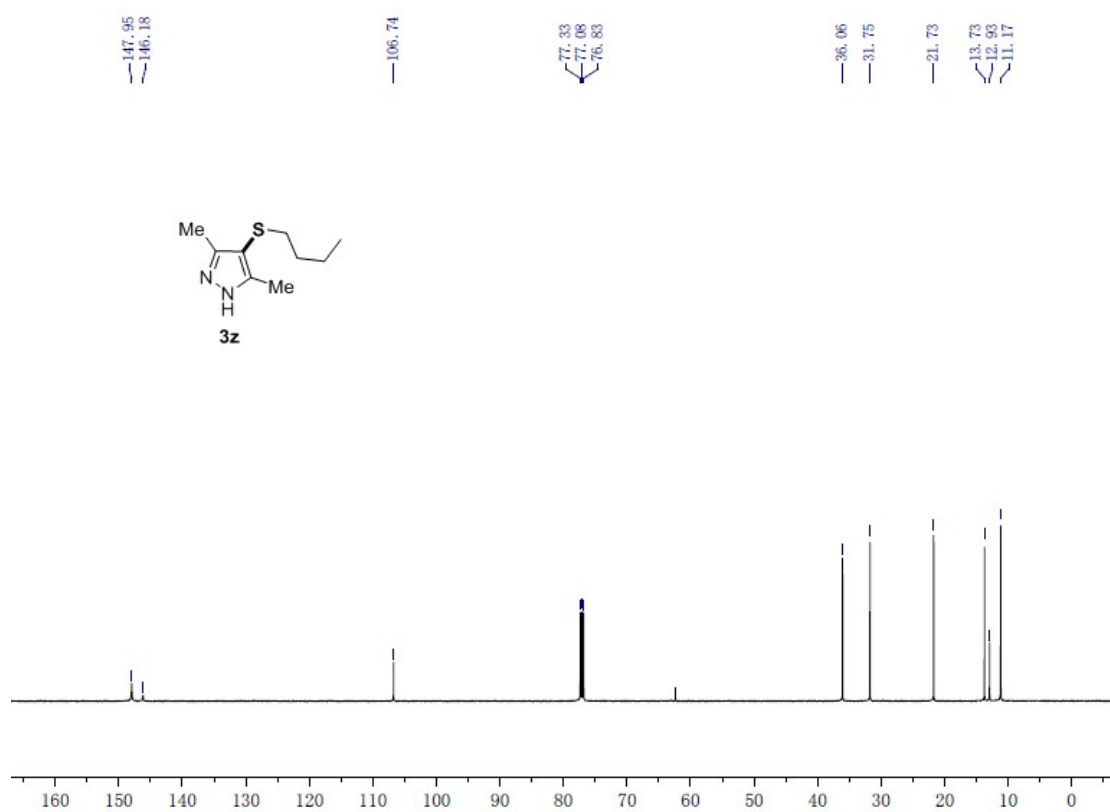

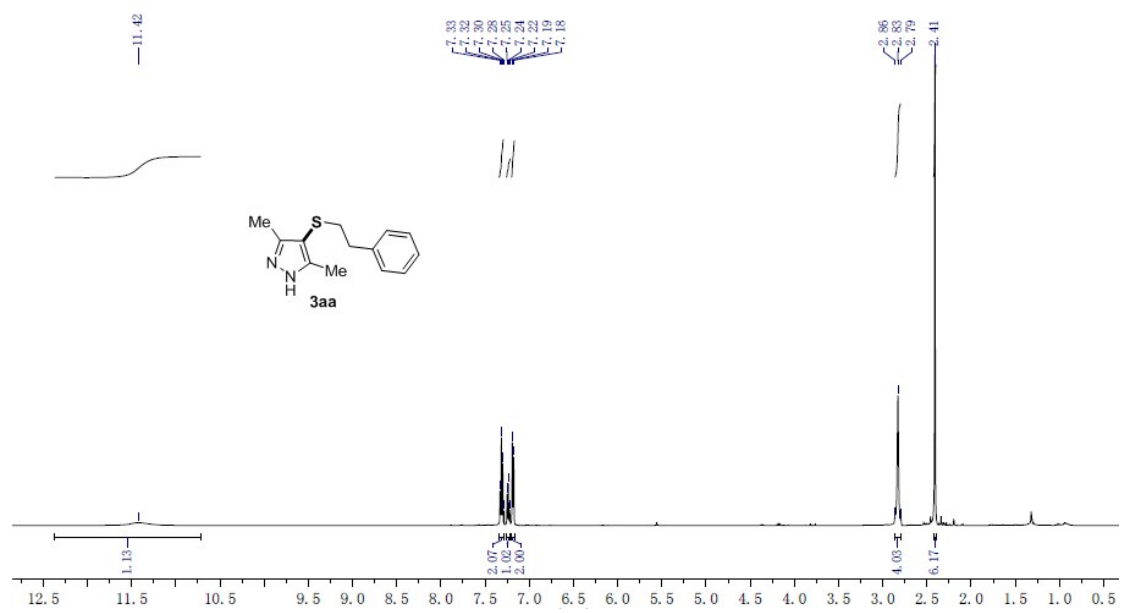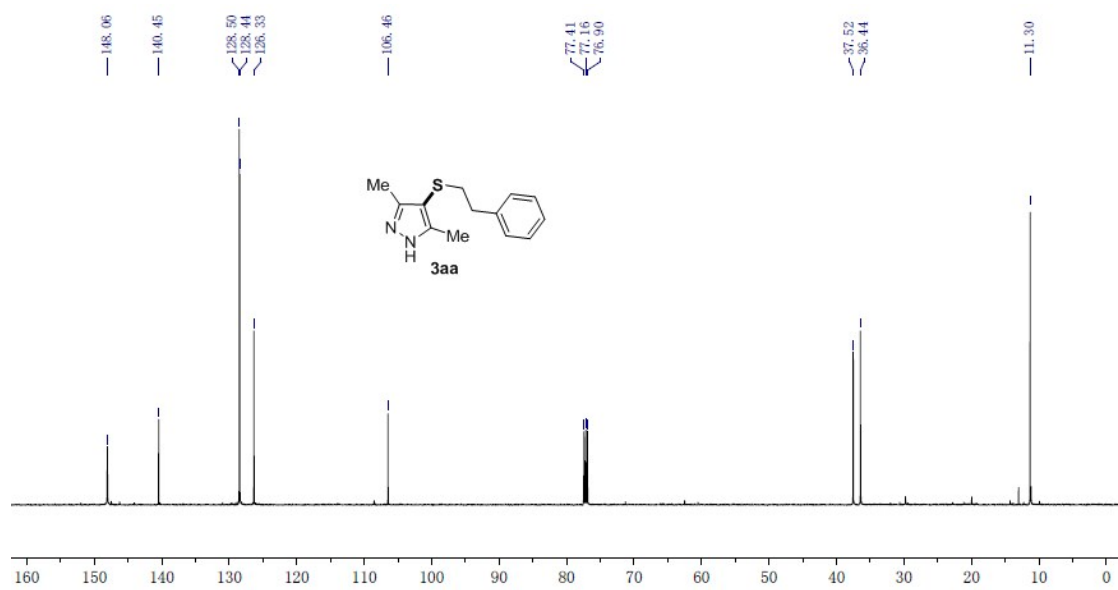

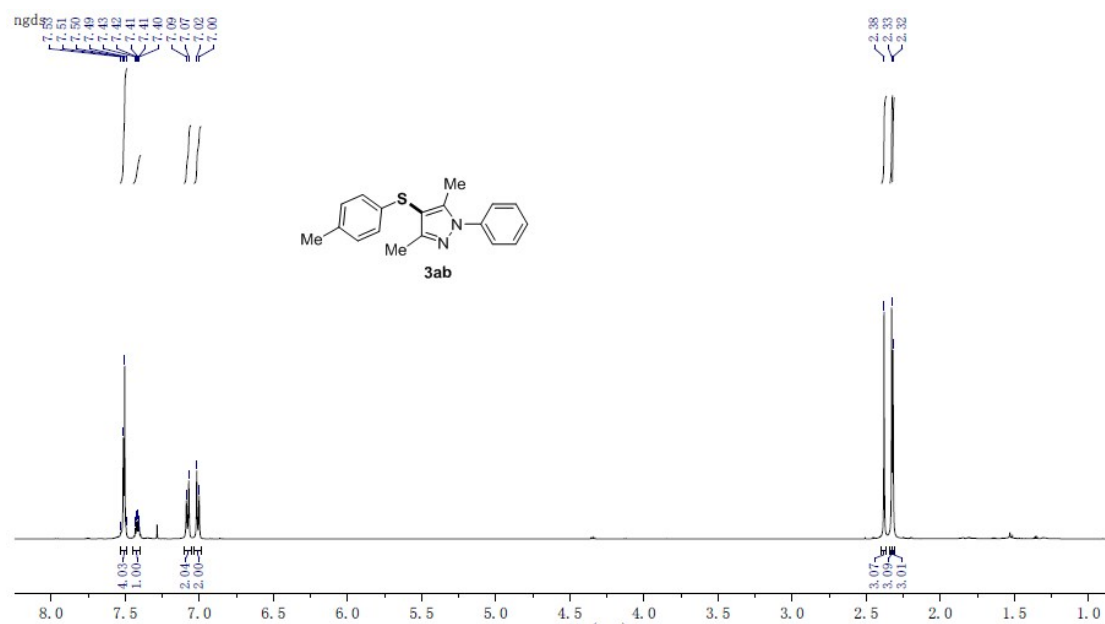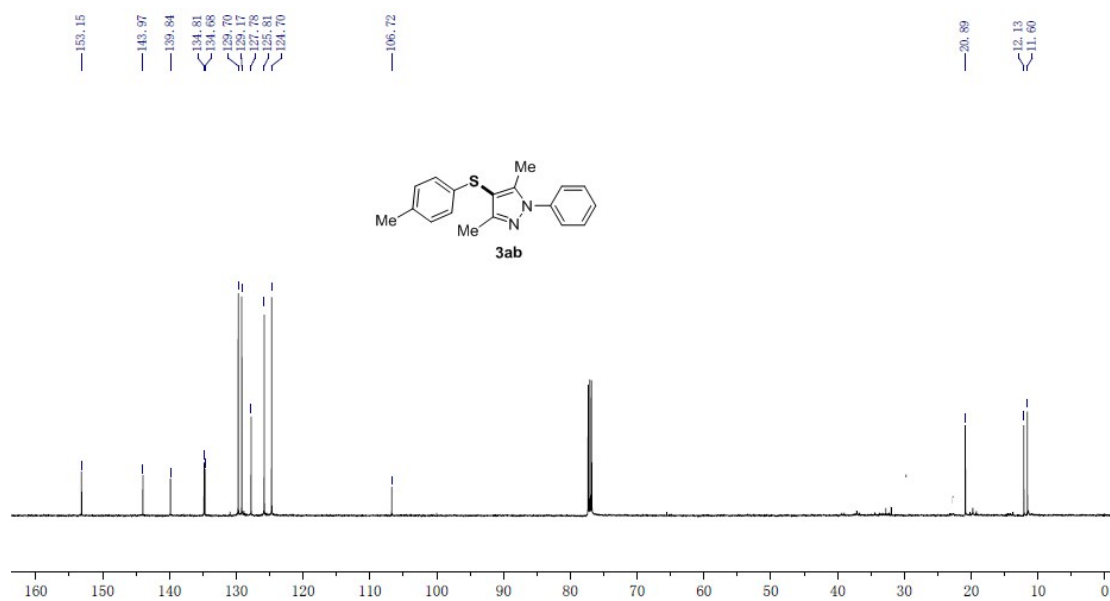



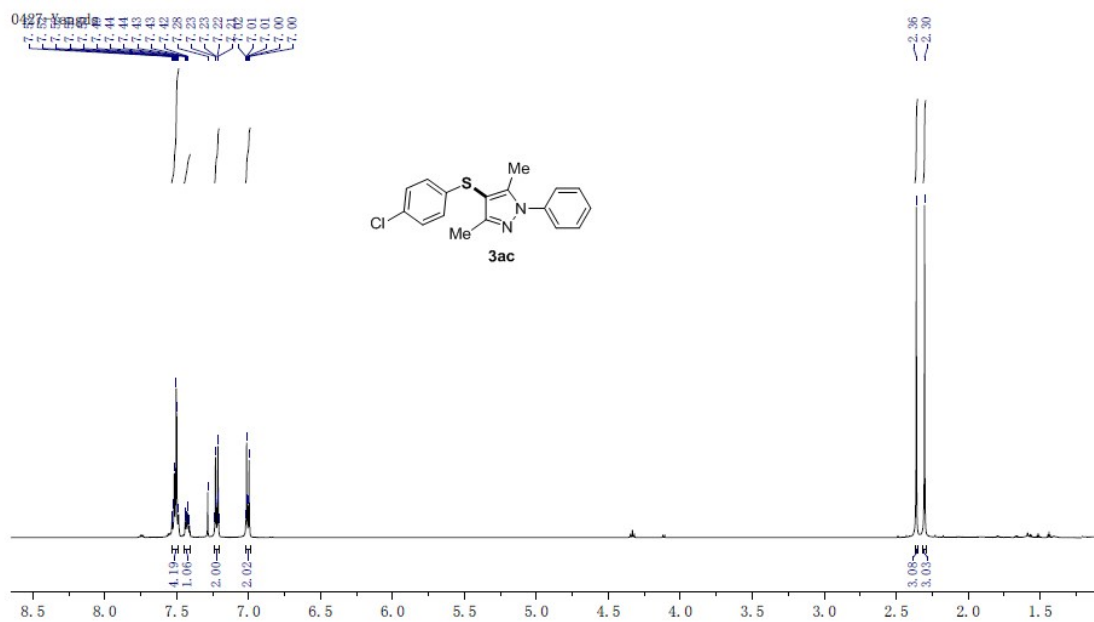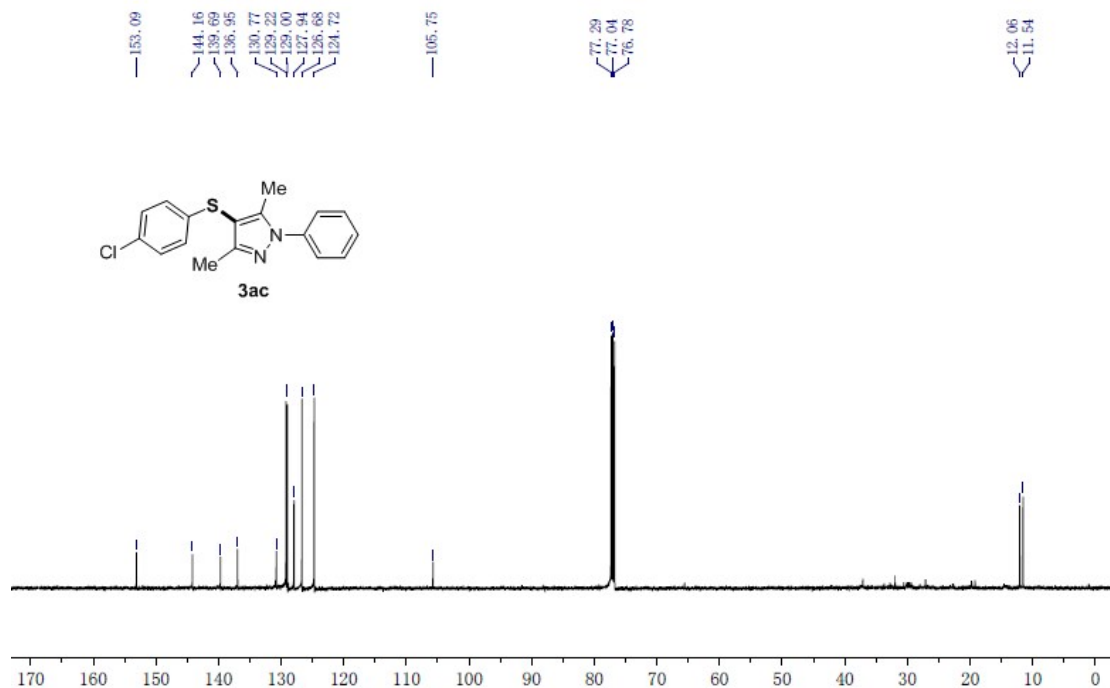

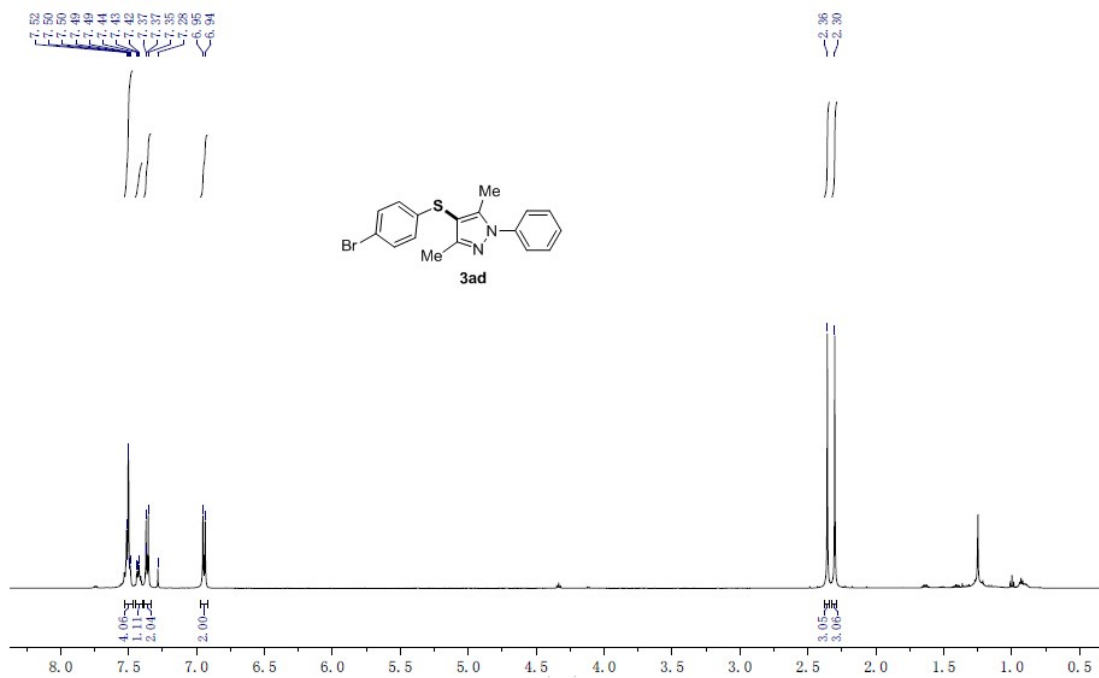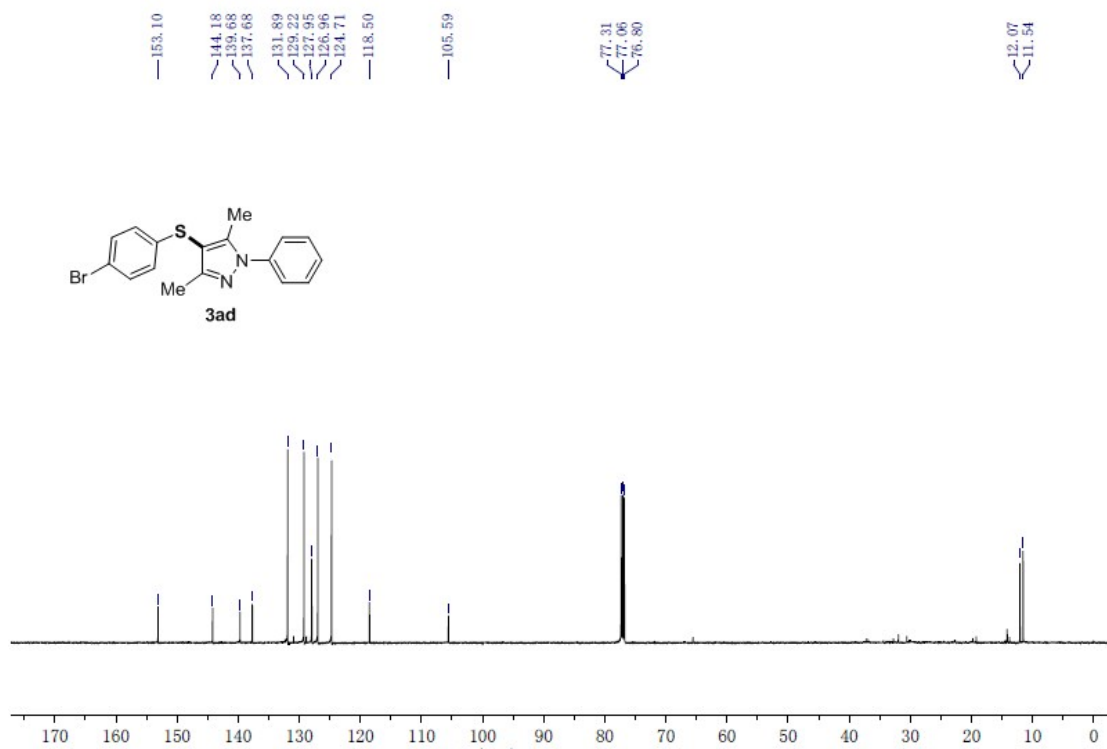

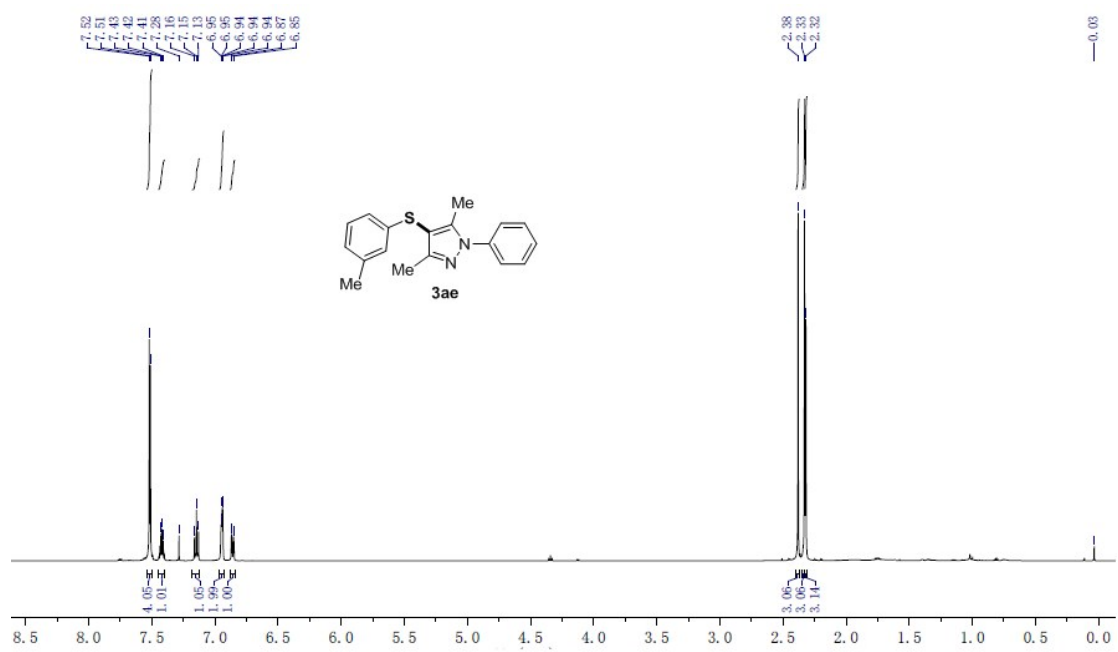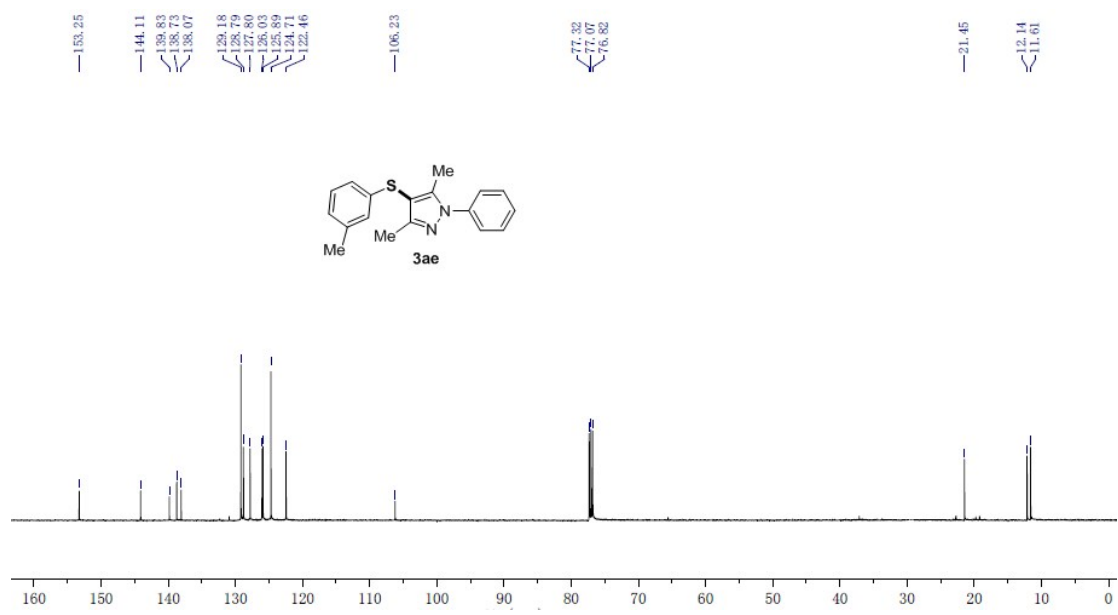

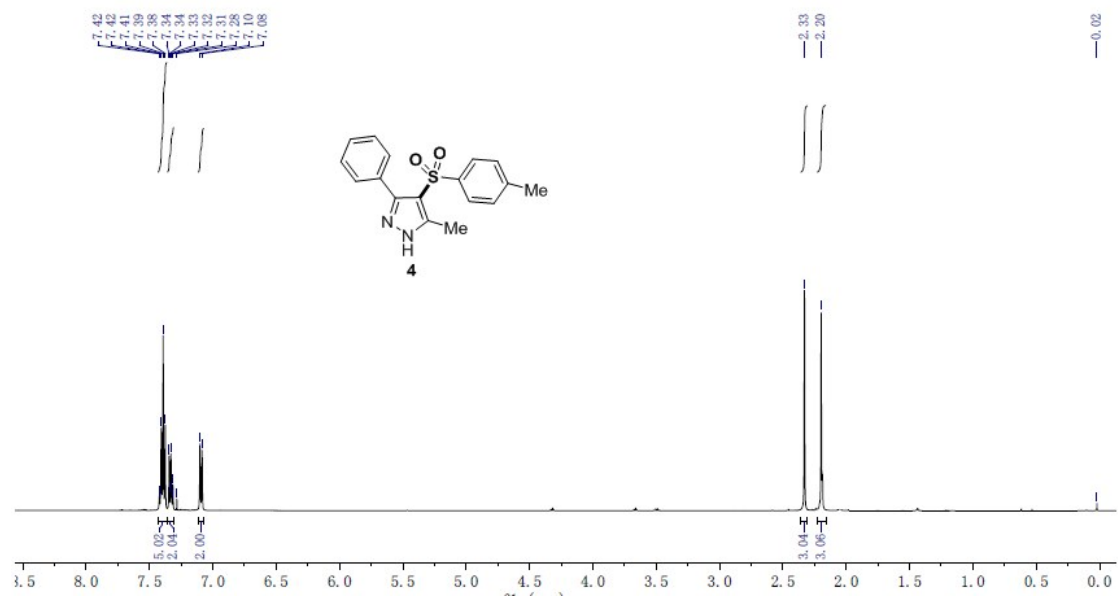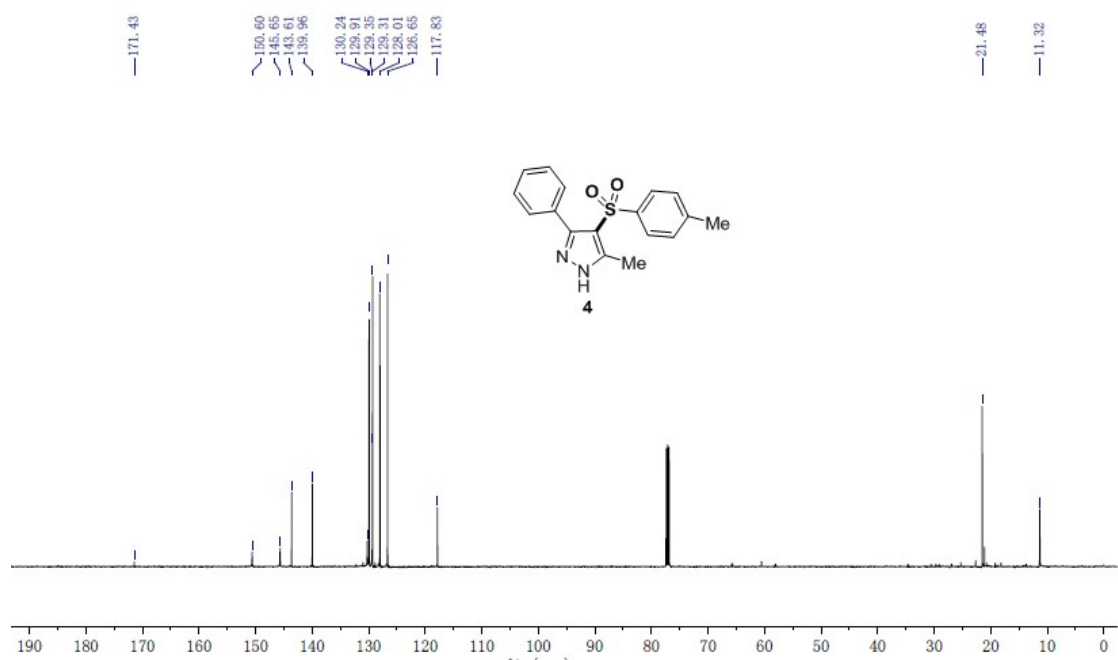

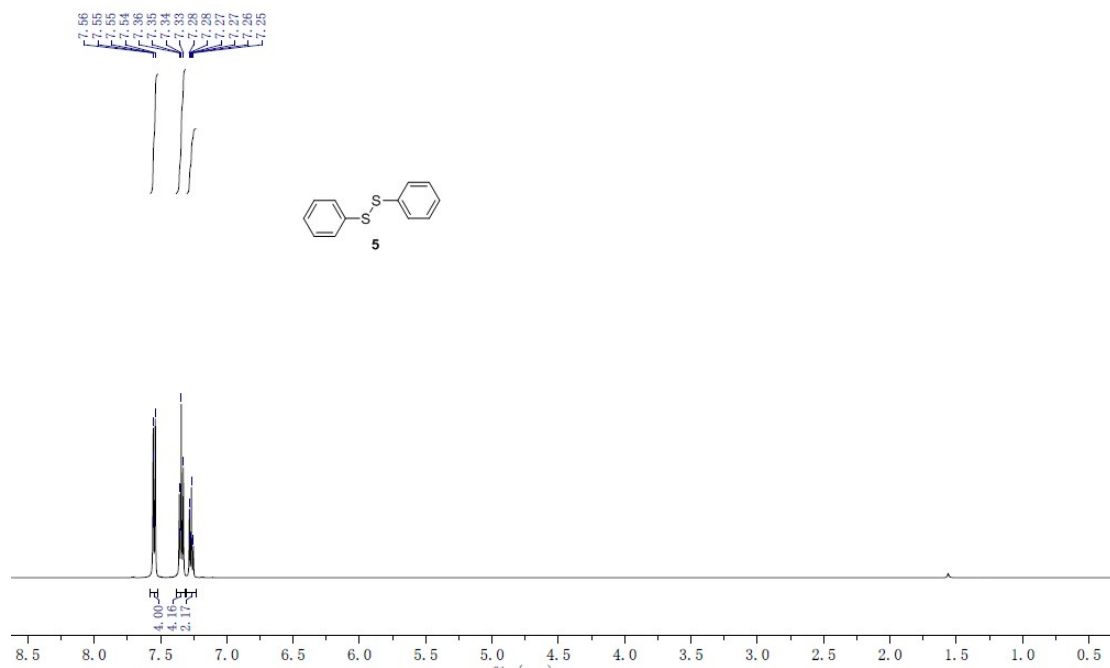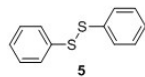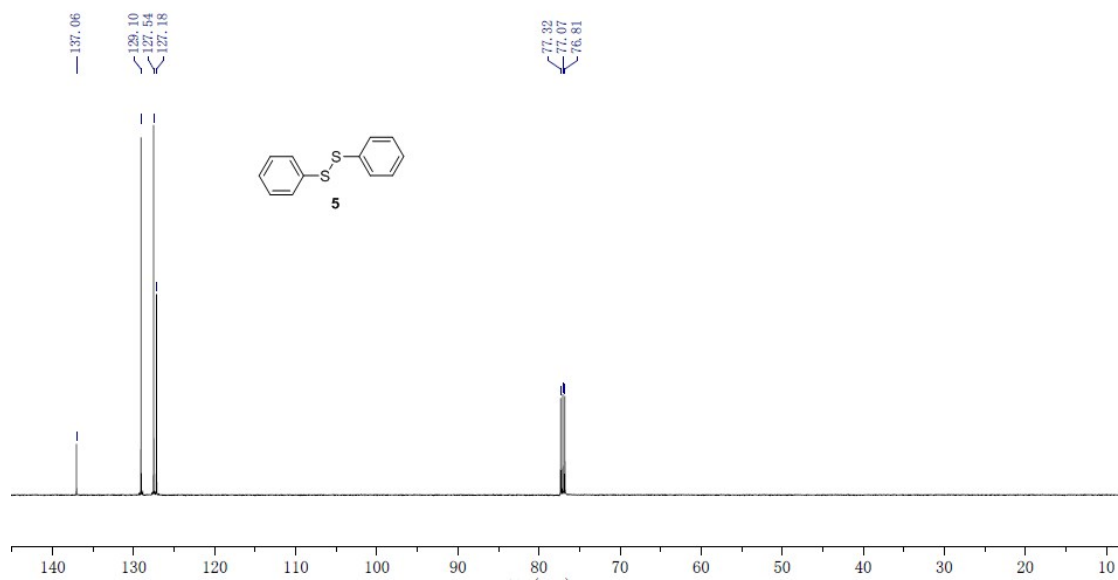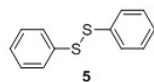

## Kinetic Isotopic Effect (KIE) Studies:

A 25 ml Schlenk tube equipped with a magnetic stirring bar was charged with iodine (5 mg, 0.02 mmol), 5-methyl-3-phenyl-1*H*-pyrazole **1a** (0.1 mmol), **1a-d<sub>4</sub>** (0.2 mmol), benzenethiol **2a** (0.24 mmol), and DMSO (2 mL). The tube was sealed, and then the mixture was stirred under air atmosphere at 100 °C for 18 h. After completion of the reaction, the resulting solution was cooled down to room temperature, and the solvent was removed with the aid of a rotary evaporator. The residue was purified by column chromatography on silica gel using petroleum ether/ethyl acetate as eluent to provide the desired product, the product was analyzed by <sup>1</sup>H-NMR (500 MHz) (Figure S1). The result was summarized in equation S1:

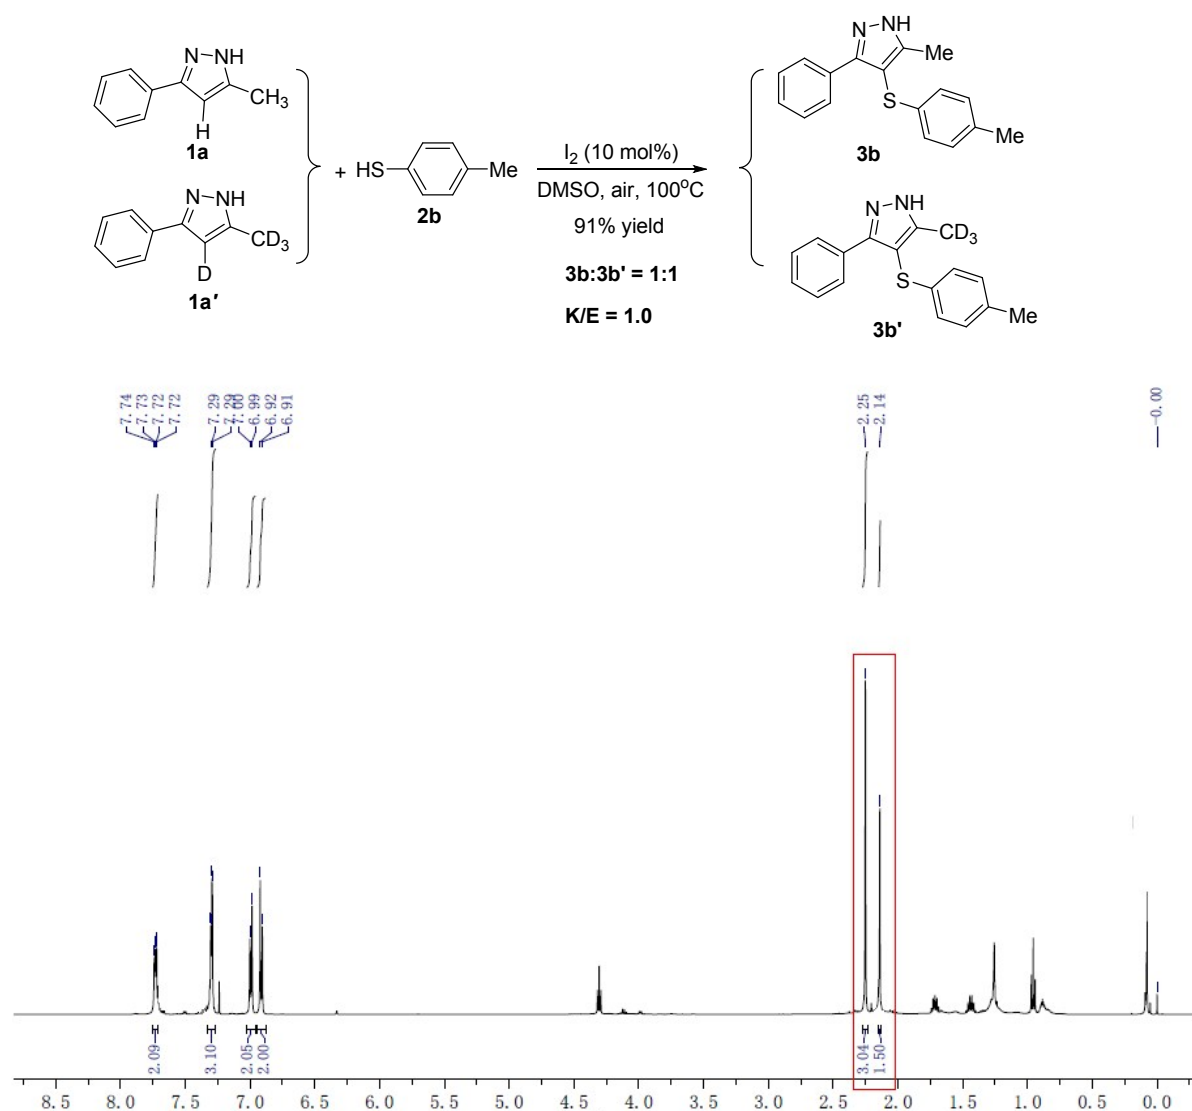

**Figure S1.** The <sup>1</sup>H-NMR spectrum of **3b** and **3b-d<sub>3</sub>**
